# Supplementary material for: Effect of SARS-CoV-2 infection on host competing endogenous RNA and miRNA network
Source: PeerJ. 2021 Oct 20;9:e12370. doi: 10.7717/peerj.12370 (PMC8541317; doi:10.7717/peerj.12370)
Supplement: Supplemental Information 1 — 1. Functional enrichment results of genes lost perturbation ability in presence of SARS-CoV-2 2. Functional enrichment results of genes which were affected by genes lost perturbation ability in presence of SARS-CoV-2 3. Functional enrichment results of miRNAs gained perturbation ability in presence of SARS-CoV-2 4. Genes and miRNAs which had differentiated perturbation ability in presence of SARS-CoV-1 5. Genes and miRNAs which had differentiated perturbation ability in presence of SARS-CoV-2 [file peerj-09-12370-s001.xlsx]

## Sheet: General_Info
Sheet No	Name	Description
#2	Perturbed_gene_annotations	Functional enrichment results of genes lost perturbation ability in presence of SARS-CoV-2
#3	Affected_gene_annotations	Functional enrichment results of genes which were affected by genes lost perturbation ability in presence of SARS-CoV-2
#4	miRNA_annotations	Functional enrichment results of miRNAs gained perturbation ability in presence of SARS-CoV-2
#5	SARS-CoV-1_perturbation_dif	Genes and miRNAs which had differentiated perturbation ability in presence of SARS-CoV-1
#6	SARS-CoV-2_perturbation_dif	Genes and miRNAs which had differentiated perturbation ability in presence of SARS-CoV-2

## Sheet: Perturbed_gene_annotations
	Category	Term	Count	%	PValue	Genes	List Total	Pop Hits	Pop Total	Fold Enrichment	Bonferroni	Benjamini	FDR
1	GOTERM_BP_DIRECT	GO:0045944~positive regulation of transcription from RNA polymerase II promoter	38	19.5876	3.91545e-11	ENSG00000106004, ENSG00000179348, ENSG00000016082, ENSG00000135503, ENSG00000135828, ENSG00000119042, ENSG00000116128, ENSG00000134852, ENSG00000136634, ENSG00000133740, ENSG00000138336, ENSG00000077092, ENSG00000121989, ENSG00000148400, ENSG00000185697, ENSG00000126778, ENSG00000169926, ENSG00000125740, ENSG00000136826, ENSG00000106511, ENSG00000136869, ENSG00000173473, ENSG00000108518, ENSG0000…	187	981	16792	3.47837	7.98753e-08	7.98753e-08	7.76435e-08
2	GOTERM_MF_DIRECT	GO:0005515~protein binding	134	69.0722	3.67683e-10	ENSG00000016082, ENSG00000024422, ENSG00000040199, ENSG00000116128, ENSG00000134996, ENSG00000184182, ENSG00000164056, ENSG00000121966, ENSG00000148400, ENSG00000168811, ENSG00000136826, ENSG00000114739, ENSG00000106799, ENSG00000131899, ENSG00000175595, ENSG00000181472, ENSG00000178585, ENSG00000113369, ENSG00000112038, ENSG00000170345, ENSG00000134248, ENSG00000102879, ENSG00000166484, ENSG0000…	179	8785	16881	1.43849	1.60677e-07	1.60677e-07	1.54059e-07
3	GOTERM_BP_DIRECT	GO:0043065~positive regulation of apoptotic process	18	9.27835	4.08908e-08	ENSG00000113916, ENSG00000106004, ENSG00000196470, ENSG00000198121, ENSG00000197442, ENSG00000105329, ENSG00000130758, ENSG00000119383, ENSG00000172059, ENSG00000197548, ENSG00000077092, ENSG00000232810, ENSG00000104081, ENSG00000148400, ENSG00000096717, ENSG00000087088, ENSG00000176171, ENSG00000145335	187	300	16792	5.38781	8.34137e-05	4.17086e-05	4.05432e-05
4	GOTERM_MF_DIRECT	GO:0001077~transcriptional activator activity, RNA polymerase II core promoter proximal region sequence-specific binding	15	7.73196	2.12019e-07	ENSG00000136826, ENSG00000106511, ENSG00000106004, ENSG00000179348, ENSG00000016082, ENSG00000181690, ENSG00000116833, ENSG00000170345, ENSG00000125618, ENSG00000196628, ENSG00000185697, ENSG00000169926, ENSG00000126778, ENSG00000102034, ENSG00000125740	179	236	16881	5.99411	9.26482e-05	4.63262e-05	4.44181e-05
5	GOTERM_BP_DIRECT	GO:0000122~negative regulation of transcription from RNA polymerase II promoter	26	13.4021	4.01897e-07	ENSG00000113916, ENSG00000179348, ENSG00000016082, ENSG00000119042, ENSG00000153814, ENSG00000172059, ENSG00000100307, ENSG00000077092, ENSG00000148400, ENSG00000048052, ENSG00000121481, ENSG00000126778, ENSG00000145335, ENSG00000125740, ENSG00000107864, ENSG00000136826, ENSG00000114739, ENSG00000105329, ENSG00000197323, ENSG00000172465, ENSG00000196628, ENSG00000088305, ENSG00000232810, ENSG0000…	187	720	16792	3.24266	0.000819534	0.00027329	0.000265654
6	GOTERM_BP_DIRECT	GO:0042493~response to drug	16	8.24742	1.52455e-06	ENSG00000175054, ENSG00000151694, ENSG00000177000, ENSG00000105329, ENSG00000169021, ENSG00000134057, ENSG00000170430, ENSG00000170345, ENSG00000136634, ENSG00000051180, ENSG00000100307, ENSG00000088305, ENSG00000120899, ENSG00000180914, ENSG00000125740, ENSG00000145335	187	304	16792	4.72615	0.00310526	0.000777522	0.000755797
7	KEGG_PATHWAY	hsa04115:p53 signaling pathway	10	5.15464	2.02302e-06	ENSG00000175054, ENSG00000085117, ENSG00000196470, ENSG00000170836, ENSG00000087088, ENSG00000134057, ENSG00000183765, ENSG00000138764, ENSG00000206075, ENSG00000175305	121	67	6879	8.48526	0.000406544	0.000406627	0.000378304
8	GOTERM_BP_DIRECT	GO:0070373~negative regulation of ERK1 and ERK2 cascade	8	4.12371	3.41019e-06	ENSG00000136826, ENSG00000120875, ENSG00000136869, ENSG00000164056, ENSG00000187678, ENSG00000136158, ENSG00000142082, ENSG00000198947	187	58	16792	12.3858	0.00693265	0.0011693	0.00113663
9	GOTERM_BP_DIRECT	GO:0001666~response to hypoxia	12	6.18557	3.43913e-06	ENSG00000151694, ENSG00000167772, ENSG00000088305, ENSG00000120899, ENSG00000177000, ENSG00000105329, ENSG00000121966, ENSG00000185499, ENSG00000108691, ENSG00000069702, ENSG00000176171, ENSG00000152952	187	172	16792	6.26489	0.00699128	0.0011693	0.00113663
10	GOTERM_BP_DIRECT	GO:0008284~positive regulation of cell proliferation	19	9.79381	4.45689e-06	ENSG00000106799, ENSG00000151694, ENSG00000016082, ENSG00000197461, ENSG00000160712, ENSG00000105329, ENSG00000196776, ENSG00000081985, ENSG00000157168, ENSG00000170961, ENSG00000138336, ENSG00000077092, ENSG00000113070, ENSG00000138182, ENSG00000120899, ENSG00000102755, ENSG00000148400, ENSG00000096717, ENSG00000163577	187	466	16792	3.66124	0.00905088	0.00129887	0.00126257
11	GOTERM_MF_DIRECT	GO:0000978~RNA polymerase II core promoter proximal region sequence-specific DNA binding	16	8.24742	5.53498e-06	ENSG00000106511, ENSG00000106004, ENSG00000016082, ENSG00000173473, ENSG00000181690, ENSG00000116833, ENSG00000134852, ENSG00000170345, ENSG00000125618, ENSG00000196628, ENSG00000185499, ENSG00000185697, ENSG00000169926, ENSG00000126778, ENSG00000102034, ENSG00000125740	179	355	16881	4.25047	0.00241587	0.000605045	0.000580123
12	GOTERM_MF_DIRECT	GO:0048185~activin binding	5	2.57732	5.53817e-06	ENSG00000114739, ENSG00000135503, ENSG00000121989, ENSG00000101665, ENSG00000069702	179	12	16881	39.2947	0.00241726	0.000605045	0.000580123
13	GOTERM_MF_DIRECT	GO:0019838~growth factor binding	6	3.09278	8.24128e-06	ENSG00000106799, ENSG00000114739, ENSG00000135503, ENSG00000121989, ENSG00000102755, ENSG00000118257	179	27	16881	20.9572	0.00359498	0.000720288	0.000690619
14	GOTERM_BP_DIRECT	GO:0030335~positive regulation of cell migration	11	5.6701	3.95457e-05	ENSG00000151694, ENSG00000106799, ENSG00000197461, ENSG00000113070, ENSG00000102879, ENSG00000120899, ENSG00000105329, ENSG00000153071, ENSG00000102755, ENSG00000148400, ENSG00000170961	187	184	16792	5.36829	0.0775064	0.00844109	0.00820524
15	GOTERM_BP_DIRECT	GO:0051897~positive regulation of protein kinase B signaling	8	4.12371	4.0325e-05	ENSG00000106799, ENSG00000197461, ENSG00000113070, ENSG00000105329, ENSG00000232810, ENSG00000136158, ENSG00000066777, ENSG00000157168	187	84	16792	8.55208	0.0789718	0.00844109	0.00820524
16	GOTERM_BP_DIRECT	GO:0045892~negative regulation of transcription, DNA-templated	18	9.27835	4.13779e-05	ENSG00000136826, ENSG00000113916, ENSG00000105329, ENSG00000130758, ENSG00000197323, ENSG00000172059, ENSG00000157168, ENSG00000134852, ENSG00000166167, ENSG00000232810, ENSG00000153071, ENSG00000050165, ENSG00000148400, ENSG00000096717, ENSG00000048052, ENSG00000124788, ENSG00000256683, ENSG00000186416	187	499	16792	3.23916	0.0809481	0.00844109	0.00820524
17	GOTERM_BP_DIRECT	GO:0043433~negative regulation of sequence-specific DNA binding transcription factor activity	7	3.60825	5.19163e-05	ENSG00000166167, ENSG00000178585, ENSG00000130758, ENSG00000096717, ENSG00000101665, ENSG00000121481, ENSG00000164930	187	60	16792	10.4763	0.100496	0.00962811	0.00935908
18	GOTERM_BP_DIRECT	GO:0045893~positive regulation of transcription, DNA-templated	18	9.27835	6.11729e-05	ENSG00000136826, ENSG00000106799, ENSG00000173473, ENSG00000105329, ENSG00000116833, ENSG00000134852, ENSG00000170345, ENSG00000136634, ENSG00000125618, ENSG00000196628, ENSG00000166167, ENSG00000232810, ENSG00000153071, ENSG00000148400, ENSG00000185697, ENSG00000126778, ENSG00000183765, ENSG00000102034	187	515	16792	3.13853	0.117323	0.00964488	0.00937539
19	GOTERM_BP_DIRECT	GO:0017015~regulation of transforming growth factor beta receptor signaling pathway	5	2.57732	6.14625e-05	ENSG00000105329, ENSG00000050165, ENSG00000197323, ENSG00000101665, ENSG00000116128	187	20	16792	22.4492	0.117845	0.00964488	0.00937539
20	GOTERM_BP_DIRECT	GO:0046330~positive regulation of JNK cascade	7	3.60825	8.18227e-05	ENSG00000136869, ENSG00000197442, ENSG00000120899, ENSG00000232810, ENSG00000130758, ENSG00000115008, ENSG00000172575	187	65	16792	9.67042	0.153737	0.0115646	0.0112415
21	GOTERM_BP_DIRECT	GO:0001934~positive regulation of protein phosphorylation	9	4.63918	8.5034e-05	ENSG00000151694, ENSG00000121989, ENSG00000105329, ENSG00000232810, ENSG00000153071, ENSG00000096717, ENSG00000172575, ENSG00000183765, ENSG00000137312	187	127	16792	6.36355	0.159263	0.0115646	0.0112415
22	GOTERM_MF_DIRECT	GO:0042803~protein homodimerization activity	21	10.8247	9.02134e-05	ENSG00000197461, ENSG00000160712, ENSG00000129473, ENSG00000197442, ENSG00000105329, ENSG00000130758, ENSG00000172575, ENSG00000119383, ENSG00000152642, ENSG00000116017, ENSG00000197548, ENSG00000171206, ENSG00000196628, ENSG00000102837, ENSG00000138182, ENSG00000102879, ENSG00000188641, ENSG00000160179, ENSG00000087088, ENSG00000183765, ENSG00000176171	179	730	16881	2.71295	0.038658	0.00576943	0.00553179
23	GOTERM_MF_DIRECT	GO:0004675~transmembrane receptor protein serine/threonine kinase activity	4	2.06186	9.24165e-05	ENSG00000106799, ENSG00000114739, ENSG00000135503, ENSG00000121989	179	9	16881	41.9143	0.0395832	0.00576943	0.00553179
24	GOTERM_BP_DIRECT	GO:0097191~extrinsic apoptotic signaling pathway	6	3.09278	9.63963e-05	ENSG00000160712, ENSG00000135503, ENSG00000105329, ENSG00000232810, ENSG00000087088, ENSG00000168811	187	42	16792	12.8281	0.178528	0.0122905	0.0119471
25	GOTERM_BP_DIRECT	GO:0008285~negative regulation of cell proliferation	15	7.73196	0.00013679	ENSG00000136826, ENSG00000113916, ENSG00000105329, ENSG00000115008, ENSG00000136158, ENSG00000172059, ENSG00000112038, ENSG00000136634, ENSG00000119950, ENSG00000164056, ENSG00000077092, ENSG00000170836, ENSG00000120899, ENSG00000148400, ENSG00000169926	187	396	16792	3.40139	0.243513	0.0164147	0.0159561
26	KEGG_PATHWAY	hsa05161:Hepatitis B	11	5.6701	0.000203534	ENSG00000136869, ENSG00000106799, ENSG00000126561, ENSG00000120899, ENSG00000105329, ENSG00000232810, ENSG00000087088, ENSG00000007968, ENSG00000170345, ENSG00000134248, ENSG00000175305	121	145	6879	4.31285	0.0400889	0.0173855	0.0161746
27	GOTERM_BP_DIRECT	GO:0009952~anterior/posterior pattern specification	7	3.60825	0.000259541	ENSG00000106004, ENSG00000106799, ENSG00000114739, ENSG00000078399, ENSG00000121989, ENSG00000178585, ENSG00000120068	187	80	16792	7.85722	0.41112	0.0294146	0.0285928
28	GOTERM_MF_DIRECT	GO:0003682~chromatin binding	14	7.21649	0.000266058	ENSG00000113916, ENSG00000179348, ENSG00000016082, ENSG00000173473, ENSG00000119042, ENSG00000116833, ENSG00000170345, ENSG00000116017, ENSG00000051180, ENSG00000196628, ENSG00000100307, ENSG00000088305, ENSG00000121481, ENSG00000126778	179	391	16881	3.37673	0.109777	0.0145334	0.0139348
29	KEGG_PATHWAY	hsa04060:Cytokine-cytokine receptor interaction	14	7.21649	0.000292874	ENSG00000106799, ENSG00000114739, ENSG00000160712, ENSG00000135503, ENSG00000105329, ENSG00000115008, ENSG00000081985, ENSG00000116678, ENSG00000136634, ENSG00000121989, ENSG00000121966, ENSG00000232810, ENSG00000108691, ENSG00000168811	121	243	6879	3.27538	0.0571765	0.0173855	0.0161746
30	GOTERM_BP_DIRECT	GO:0060389~pathway-restricted SMAD protein phosphorylation	4	2.06186	0.000352428	ENSG00000106799, ENSG00000105329, ENSG00000101665, ENSG00000069702	187	13	16792	27.6298	0.5128	0.0370181	0.0359838
31	GOTERM_BP_DIRECT	GO:0071479~cellular response to ionizing radiation	5	2.57732	0.000362923	ENSG00000051180, ENSG00000105329, ENSG00000096717, ENSG00000170430, ENSG00000134852	187	31	16792	14.4834	0.523123	0.0370181	0.0359838
32	GOTERM_MF_DIRECT	GO:0043565~sequence-specific DNA binding	16	8.24742	0.000398117	ENSG00000113916, ENSG00000106511, ENSG00000106004, ENSG00000016082, ENSG00000164749, ENSG00000119042, ENSG00000116833, ENSG00000134852, ENSG00000170345, ENSG00000077092, ENSG00000078399, ENSG00000148400, ENSG00000126778, ENSG00000120068, ENSG00000102034, ENSG00000125740	179	518	16881	2.91297	0.159713	0.0190973	0.0183107
33	KEGG_PATHWAY	hsa05200:Pathways in cancer	18	9.27835	0.000429881	ENSG00000106799, ENSG00000198121, ENSG00000197461, ENSG00000126561, ENSG00000105329, ENSG00000172575, ENSG00000007968, ENSG00000170345, ENSG00000175305, ENSG00000051180, ENSG00000125618, ENSG00000145604, ENSG00000077092, ENSG00000121966, ENSG00000127955, ENSG00000162104, ENSG00000087088, ENSG00000164930	121	393	6879	2.60387	0.0827953	0.0173855	0.0161746
34	KEGG_PATHWAY	hsa05142:Chagas disease (American trypanosomiasis)	9	4.63918	0.000432475	ENSG00000136869, ENSG00000106799, ENSG00000105329, ENSG00000232810, ENSG00000127955, ENSG00000108691, ENSG00000170345, ENSG00000136634, ENSG00000168811	121	104	6879	4.91982	0.0832736	0.0173855	0.0161746
35	GOTERM_MF_DIRECT	GO:0004672~protein kinase activity	13	6.70103	0.00043701	ENSG00000175054, ENSG00000106799, ENSG00000135828, ENSG00000197442, ENSG00000130758, ENSG00000107968, ENSG00000250506, ENSG00000152256, ENSG00000117650, ENSG00000027075, ENSG00000166484, ENSG00000108691, ENSG00000183765	179	359	16881	3.41503	0.17388	0.0190973	0.0183107
36	GOTERM_BP_DIRECT	GO:0051726~regulation of cell cycle	8	4.12371	0.000462466	ENSG00000166167, ENSG00000145604, ENSG00000250506, ENSG00000134057, ENSG00000007968, ENSG00000138764, ENSG00000133740, ENSG00000175305	187	124	16792	5.79334	0.610795	0.0449253	0.04367
37	GOTERM_BP_DIRECT	GO:0071407~cellular response to organic cyclic compound	6	3.09278	0.000487361	ENSG00000166167, ENSG00000105329, ENSG00000232810, ENSG00000134057, ENSG00000108691, ENSG00000170430	187	59	16792	9.13188	0.630076	0.0451917	0.0439289
38	GOTERM_BP_DIRECT	GO:0007179~transforming growth factor beta receptor signaling pathway	7	3.60825	0.000552043	ENSG00000106799, ENSG00000105329, ENSG00000089159, ENSG00000101665, ENSG00000108691, ENSG00000069702, ENSG00000170345	187	92	16792	6.83236	0.675827	0.0489638	0.0475957
39	GOTERM_BP_DIRECT	GO:0031648~protein destabilization	5	2.57732	0.000583439	ENSG00000166167, ENSG00000196470, ENSG00000096717, ENSG00000007944, ENSG00000145335	187	35	16792	12.8281	0.69595	0.0490681	0.0476971
40	GOTERM_BP_DIRECT	GO:0006366~transcription from RNA polymerase II promoter	16	8.24742	0.000604299	ENSG00000136826, ENSG00000106511, ENSG00000106004, ENSG00000179348, ENSG00000016082, ENSG00000181690, ENSG00000172059, ENSG00000134852, ENSG00000170345, ENSG00000116017, ENSG00000125618, ENSG00000185697, ENSG00000169926, ENSG00000126778, ENSG00000102034, ENSG00000125740	187	513	16792	2.80068	0.708625	0.0490681	0.0476971
41	KEGG_PATHWAY	hsa04350:TGF-beta signaling pathway	8	4.12371	0.000615394	ENSG00000106799, ENSG00000114739, ENSG00000135503, ENSG00000121989, ENSG00000105329, ENSG00000232810, ENSG00000101665, ENSG00000133740	121	84	6879	5.4144	0.116384	0.0206157	0.0191798
42	GOTERM_MF_DIRECT	GO:0004674~protein serine/threonine kinase activity	13	6.70103	0.000658104	ENSG00000175054, ENSG00000106799, ENSG00000114739, ENSG00000135503, ENSG00000197442, ENSG00000130758, ENSG00000107968, ENSG00000250506, ENSG00000117650, ENSG00000027075, ENSG00000121989, ENSG00000166484, ENSG00000183765	179	376	16881	3.26062	0.250003	0.025554	0.0245015
43	GOTERM_BP_DIRECT	GO:0060216~definitive hemopoiesis	4	2.06186	0.000673376	ENSG00000179348, ENSG00000078399, ENSG00000069702, ENSG00000160710	187	16	16792	22.4492	0.746945	0.0490681	0.0476971
44	GOTERM_BP_DIRECT	GO:0032924~activin receptor signaling pathway	4	2.06186	0.000673376	ENSG00000106799, ENSG00000114739, ENSG00000135503, ENSG00000121989	187	16	16792	22.4492	0.746945	0.0490681	0.0476971
45	GOTERM_MF_DIRECT	GO:0008022~protein C-terminus binding	9	4.63918	0.000701713	ENSG00000051180, ENSG00000196628, ENSG00000196470, ENSG00000102879, ENSG00000175595, ENSG00000153071, ENSG00000096717, ENSG00000124788, ENSG00000112038	179	182	16881	4.66355	0.26417	0.025554	0.0245015
46	GOTERM_BP_DIRECT	GO:0007275~multicellular organism development	16	8.24742	0.000707999	ENSG00000175054, ENSG00000106511, ENSG00000106004, ENSG00000196470, ENSG00000198369, ENSG00000116678, ENSG00000076770, ENSG00000125618, ENSG00000078399, ENSG00000153071, ENSG00000050165, ENSG00000148400, ENSG00000187678, ENSG00000120068, ENSG00000256453, ENSG00000164930	187	521	16792	2.75767	0.764214	0.0490681	0.0476971
47	GOTERM_BP_DIRECT	GO:0030512~negative regulation of transforming growth factor beta receptor signaling pathway	6	3.09278	0.000709881	ENSG00000151694, ENSG00000106799, ENSG00000105329, ENSG00000096717, ENSG00000101665, ENSG00000069702	187	64	16792	8.41845	0.765118	0.0490681	0.0476971
48	GOTERM_BP_DIRECT	GO:0060011~Sertoli cell proliferation	3	1.54639	0.00072159	ENSG00000129473, ENSG00000121989, ENSG00000087088	187	4	16792	67.3476	0.770666	0.0490681	0.0476971
49	GOTERM_BP_DIRECT	GO:0070374~positive regulation of ERK1 and ERK2 cascade	9	4.63918	0.000751269	ENSG00000136869, ENSG00000197461, ENSG00000120899, ENSG00000105329, ENSG00000232810, ENSG00000136158, ENSG00000172575, ENSG00000108691, ENSG00000112038	187	175	16792	4.61812	0.784148	0.0494383	0.048057
50	GOTERM_BP_DIRECT	GO:0001657~ureteric bud development	5	2.57732	0.000801513	ENSG00000164056, ENSG00000077092, ENSG00000105329, ENSG00000101665, ENSG00000126778	187	38	16792	11.8154	0.805192	0.0501365	0.0487356
51	GOTERM_BP_DIRECT	GO:0032722~positive regulation of chemokine production	4	2.06186	0.000811031	ENSG00000136869, ENSG00000151694, ENSG00000160712, ENSG00000232810	187	17	16792	21.1287	0.808941	0.0501365	0.0487356
52	KEGG_PATHWAY	hsa05321:Inflammatory bowel disease (IBD)	7	3.60825	0.000816518	ENSG00000136869, ENSG00000105329, ENSG00000232810, ENSG00000115008, ENSG00000081985, ENSG00000136634, ENSG00000168811	121	64	6879	6.2181	0.151417	0.0234457	0.0218127
53	GOTERM_MF_DIRECT	GO:0051019~mitogen-activated protein kinase binding	4	2.06186	0.000837131	ENSG00000158050, ENSG00000170836, ENSG00000166484, ENSG00000096717	179	18	16881	20.9572	0.306483	0.0281405	0.0269814
54	GOTERM_BP_DIRECT	GO:0001525~angiogenesis	10	5.15464	0.000867193	ENSG00000106511, ENSG00000197461, ENSG00000167772, ENSG00000120899, ENSG00000102755, ENSG00000096717, ENSG00000108691, ENSG00000116678, ENSG00000005108, ENSG00000118257	187	223	16792	4.02676	0.82964	0.0516094	0.0501674
55	GOTERM_BP_DIRECT	GO:0032570~response to progesterone	5	2.57732	0.000885455	ENSG00000105329, ENSG00000180914, ENSG00000108691, ENSG00000170345, ENSG00000125740	187	39	16792	11.5124	0.835875	0.0516094	0.0501674
56	GOTERM_BP_DIRECT	GO:0007507~heart development	9	4.63918	0.00100415	ENSG00000179348, ENSG00000106799, ENSG00000100714, ENSG00000114739, ENSG00000105329, ENSG00000148400, ENSG00000048052, ENSG00000180914, ENSG00000118257	187	183	16792	4.41624	0.871201	0.056902	0.0553121
57	GOTERM_MF_DIRECT	GO:0003700~transcription factor activity, sequence-specific DNA binding	22	11.3402	0.0012276	ENSG00000136826, ENSG00000113916, ENSG00000106511, ENSG00000106004, ENSG00000179348, ENSG00000126561, ENSG00000164749, ENSG00000172465, ENSG00000181690, ENSG00000172059, ENSG00000116833, ENSG00000007968, ENSG00000134852, ENSG00000170345, ENSG00000133740, ENSG00000125618, ENSG00000196628, ENSG00000148400, ENSG00000101665, ENSG00000126778, ENSG00000120068, ENSG00000125740	179	961	16881	2.15896	0.415379	0.0383187	0.0367403
58	GOTERM_BP_DIRECT	GO:0045429~positive regulation of nitric oxide biosynthetic process	5	2.57732	0.00128359	ENSG00000136826, ENSG00000136869, ENSG00000120899, ENSG00000232810, ENSG00000112038	187	43	16792	10.4415	0.927212	0.0707709	0.0687935
59	KEGG_PATHWAY	hsa04110:Cell cycle	9	4.63918	0.00138409	ENSG00000175054, ENSG00000145604, ENSG00000105329, ENSG00000134057, ENSG00000007968, ENSG00000183765, ENSG00000133740, ENSG00000170027, ENSG00000175305	121	124	6879	4.1263	0.243002	0.0308488	0.0287001
60	KEGG_PATHWAY	hsa05140:Leishmaniasis	7	3.60825	0.00141276	ENSG00000136869, ENSG00000105329, ENSG00000232810, ENSG00000115008, ENSG00000170345, ENSG00000136634, ENSG00000168811	121	71	6879	5.60505	0.247359	0.0308488	0.0287001
61	GOTERM_BP_DIRECT	GO:0032755~positive regulation of interleukin-6 production	5	2.57732	0.00152328	ENSG00000136869, ENSG00000016082, ENSG00000160712, ENSG00000232810, ENSG00000115008	187	45	16792	9.97742	0.955393	0.0812596	0.0789891
62	KEGG_PATHWAY	hsa05144:Malaria	6	3.09278	0.00153476	ENSG00000136869, ENSG00000105329, ENSG00000232810, ENSG00000108691, ENSG00000136634, ENSG00000168811	121	49	6879	6.96138	0.265617	0.0308488	0.0287001
63	GOTERM_BP_DIRECT	GO:0032729~positive regulation of interferon-gamma production	5	2.57732	0.00165408	ENSG00000136869, ENSG00000016082, ENSG00000232810, ENSG00000081985, ENSG00000168811	187	46	16792	9.76052	0.965855	0.0812596	0.0789891
64	GOTERM_BP_DIRECT	GO:0043066~negative regulation of apoptotic process	14	7.21649	0.0017115	ENSG00000129473, ENSG00000136158, ENSG00000170430, ENSG00000136634, ENSG00000134248, ENSG00000077092, ENSG00000167772, ENSG00000120899, ENSG00000166484, ENSG00000153071, ENSG00000096717, ENSG00000160710, ENSG00000176171, ENSG00000145335	187	455	16792	2.76298	0.969634	0.0812596	0.0789891
65	GOTERM_BP_DIRECT	GO:0045666~positive regulation of neuron differentiation	6	3.09278	0.00173549	ENSG00000113916, ENSG00000196628, ENSG00000179348, ENSG00000077092, ENSG00000088305, ENSG00000198947	187	78	16792	6.90745	0.971087	0.0812596	0.0789891
66	GOTERM_MF_DIRECT	GO:0008013~beta-catenin binding	6	3.09278	0.00174608	ENSG00000136826, ENSG00000166167, ENSG00000178585, ENSG00000089159, ENSG00000101665, ENSG00000116128	179	82	16881	6.90053	0.534063	0.0477387	0.0457724
67	GOTERM_MF_DIRECT	GO:0043425~bHLH transcription factor binding	4	2.06186	0.00174787	ENSG00000196628, ENSG00000016082, ENSG00000130758, ENSG00000096717	179	23	16881	16.4013	0.534428	0.0477387	0.0457724
68	GOTERM_BP_DIRECT	GO:0060045~positive regulation of cardiac muscle cell proliferation	4	2.06186	0.00176348	ENSG00000148400, ENSG00000134057, ENSG00000069702, ENSG00000157168	187	22	16792	16.3267	0.972695	0.0812596	0.0789891
69	GOTERM_BP_DIRECT	GO:0045766~positive regulation of angiogenesis	7	3.60825	0.00176739	ENSG00000179348, ENSG00000016082, ENSG00000167772, ENSG00000120899, ENSG00000115008, ENSG00000102755, ENSG00000096717	187	115	16792	5.46589	0.972912	0.0812596	0.0789891
70	GOTERM_BP_DIRECT	GO:0008630~intrinsic apoptotic signaling pathway in response to DNA damage	5	2.57732	0.00179249	ENSG00000129473, ENSG00000232810, ENSG00000096717, ENSG00000087088, ENSG00000183765	187	47	16792	9.55285	0.974266	0.0812596	0.0789891
71	GOTERM_BP_DIRECT	GO:0071230~cellular response to amino acid stimulus	5	2.57732	0.00179249	ENSG00000107864, ENSG00000214575, ENSG00000232810, ENSG00000084636, ENSG00000134248	187	47	16792	9.55285	0.974266	0.0812596	0.0789891
72	KEGG_PATHWAY	hsa05133:Pertussis	7	3.60825	0.00187721	ENSG00000136869, ENSG00000232810, ENSG00000115008, ENSG00000127955, ENSG00000170345, ENSG00000136634, ENSG00000168811	121	75	6879	5.30612	0.314546	0.0343017	0.0319125
73	GOTERM_MF_DIRECT	GO:0044212~transcription regulatory region DNA binding	9	4.63918	0.00192576	ENSG00000136826, ENSG00000125618, ENSG00000232810, ENSG00000101665, ENSG00000172059, ENSG00000116833, ENSG00000126778, ENSG00000170345, ENSG00000145335	179	213	16881	3.98481	0.569311	0.0495034	0.0474643
74	GOTERM_BP_DIRECT	GO:0010862~positive regulation of pathway-restricted SMAD protein phosphorylation	5	2.57732	0.00193873	ENSG00000106799, ENSG00000135503, ENSG00000121989, ENSG00000105329, ENSG00000153071	187	48	16792	9.35383	0.980915	0.0854924	0.0831036
75	GOTERM_BP_DIRECT	GO:0045662~negative regulation of myoblast differentiation	4	2.06186	0.00201159	ENSG00000105329, ENSG00000232810, ENSG00000148400, ENSG00000076770	187	23	16792	15.6168	0.983556	0.0854924	0.0831036
76	GOTERM_BP_DIRECT	GO:0033137~negative regulation of peptidyl-serine phosphorylation	4	2.06186	0.00201159	ENSG00000087088, ENSG00000101665, ENSG00000152642, ENSG00000198947	187	23	16792	15.6168	0.983556	0.0854924	0.0831036
77	GOTERM_MF_DIRECT	GO:0005114~type II transforming growth factor beta receptor binding	3	1.54639	0.00224243	ENSG00000106799, ENSG00000105329, ENSG00000069702	179	7	16881	40.4174	0.625081	0.0538151	0.0515985
78	KEGG_PATHWAY	hsa04068:FoxO signaling pathway	9	4.63918	0.00226748	ENSG00000113916, ENSG00000145604, ENSG00000106799, ENSG00000105329, ENSG00000096717, ENSG00000134057, ENSG00000136634, ENSG00000176171, ENSG00000138764	121	134	6879	3.81837	0.366364	0.0379803	0.0353349
79	GOTERM_MF_DIRECT	GO:0004702~receptor signaling protein serine/threonine kinase activity	5	2.57732	0.00233979	ENSG00000106799, ENSG00000114739, ENSG00000135503, ENSG00000121989, ENSG00000107968	179	53	16881	8.89691	0.640732	0.0538151	0.0515985
80	GOTERM_BP_DIRECT	GO:0032496~response to lipopolysaccharide	8	4.12371	0.00236361	ENSG00000136869, ENSG00000151694, ENSG00000148400, ENSG00000081985, ENSG00000112038, ENSG00000170345, ENSG00000168811, ENSG00000145335	187	164	16792	4.38033	0.991993	0.0969297	0.0942214
81	GOTERM_BP_DIRECT	GO:0060449~bud elongation involved in lung branching	3	1.54639	0.00247076	ENSG00000164056, ENSG00000121039, ENSG00000136158	187	7	16792	38.4843	0.993569	0.0969297	0.0942214
82	GOTERM_BP_DIRECT	GO:2000766~negative regulation of cytoplasmic translation	3	1.54639	0.00247076	ENSG00000107864, ENSG00000214575, ENSG00000137449	187	7	16792	38.4843	0.993569	0.0969297	0.0942214
83	GOTERM_BP_DIRECT	GO:0034983~peptidyl-lysine deacetylation	3	1.54639	0.00247076	ENSG00000096717, ENSG00000142082, ENSG00000048052	187	7	16792	38.4843	0.993569	0.0969297	0.0942214
84	GOTERM_BP_DIRECT	GO:0055010~ventricular cardiac muscle tissue morphogenesis	4	2.06186	0.00257035	ENSG00000016082, ENSG00000105329, ENSG00000101665, ENSG00000069702	187	25	16792	14.3675	0.994754	0.0971526	0.0944381
85	GOTERM_BP_DIRECT	GO:0042472~inner ear morphogenesis	5	2.57732	0.00260642	ENSG00000125618, ENSG00000179348, ENSG00000136158, ENSG00000126778, ENSG00000164930	187	52	16792	8.63431	0.995127	0.0971526	0.0944381
86	GOTERM_BP_DIRECT	GO:0000165~MAPK cascade	10	5.15464	0.00262849	ENSG00000197461, ENSG00000113070, ENSG00000197442, ENSG00000120899, ENSG00000105329, ENSG00000232810, ENSG00000166484, ENSG00000172575, ENSG00000108691, ENSG00000157168	187	262	16792	3.42736	0.995342	0.0971526	0.0944381
87	GOTERM_BP_DIRECT	GO:0001822~kidney development	6	3.09278	0.00266694	ENSG00000125618, ENSG00000106799, ENSG00000114739, ENSG00000087088, ENSG00000126778, ENSG00000170961	187	86	16792	6.26489	0.995694	0.0971526	0.0944381
88	GOTERM_BP_DIRECT	GO:0007565~female pregnancy	6	3.09278	0.00309526	ENSG00000105329, ENSG00000185499, ENSG00000180914, ENSG00000170345, ENSG00000084636, ENSG00000125740	187	89	16792	6.05372	0.998207	0.110778	0.107682
89	KEGG_PATHWAY	hsa04114:Oocyte meiosis	8	4.12371	0.00313553	ENSG00000107864, ENSG00000166167, ENSG00000214575, ENSG00000162104, ENSG00000134057, ENSG00000137449, ENSG00000170027, ENSG00000175305	121	111	6879	4.09739	0.468064	0.0484802	0.0451035
90	GOTERM_BP_DIRECT	GO:0034115~negative regulation of heterotypic cell-cell adhesion	3	1.54639	0.00327038	ENSG00000136826, ENSG00000166484, ENSG00000136634	187	8	16792	33.6738	0.998747	0.111193	0.108086
91	GOTERM_BP_DIRECT	GO:0032927~positive regulation of activin receptor signaling pathway	3	1.54639	0.00327038	ENSG00000114739, ENSG00000135503, ENSG00000121989	187	8	16792	33.6738	0.998747	0.111193	0.108086
92	GOTERM_BP_DIRECT	GO:0045348~positive regulation of MHC class II biosynthetic process	3	1.54639	0.00327038	ENSG00000136869, ENSG00000096717, ENSG00000136634	187	8	16792	33.6738	0.998747	0.111193	0.108086
93	GOTERM_BP_DIRECT	GO:0007173~epidermal growth factor receptor signaling pathway	5	2.57732	0.003417	ENSG00000151694, ENSG00000113070, ENSG00000120899, ENSG00000105329, ENSG00000089159	187	56	16792	8.01757	0.999072	0.114273	0.11108
94	GOTERM_BP_DIRECT	GO:0043524~negative regulation of neuron apoptotic process	7	3.60825	0.00352581	ENSG00000016082, ENSG00000102879, ENSG00000120899, ENSG00000087088, ENSG00000108691, ENSG00000126778, ENSG00000145335	187	132	16792	4.76195	0.999257	0.116011	0.112769
95	GOTERM_BP_DIRECT	GO:0070301~cellular response to hydrogen peroxide	5	2.57732	0.00364357	ENSG00000136826, ENSG00000197442, ENSG00000166484, ENSG00000096717, ENSG00000176171	187	57	16792	7.87691	0.999416	0.117982	0.114686
96	GOTERM_BP_DIRECT	GO:0060412~ventricular septum morphogenesis	4	2.06186	0.00395319	ENSG00000106799, ENSG00000148400, ENSG00000101665, ENSG00000069702	187	29	16792	12.3858	0.99969	0.126008	0.122487
97	GOTERM_BP_DIRECT	GO:0043406~positive regulation of MAP kinase activity	5	2.57732	0.00412687	ENSG00000197461, ENSG00000105329, ENSG00000232810, ENSG00000102755, ENSG00000172575	187	59	16792	7.6099	0.999783	0.128803	0.125204
98	KEGG_PATHWAY	hsa05323:Rheumatoid arthritis	7	3.60825	0.00420667	ENSG00000136869, ENSG00000105329, ENSG00000232810, ENSG00000115008, ENSG00000102755, ENSG00000108691, ENSG00000170345	121	88	6879	4.52226	0.57144	0.0559069	0.0520129
99	GOTERM_BP_DIRECT	GO:0000086~G2/M transition of mitotic cell cycle	7	3.60825	0.0042303	ENSG00000166167, ENSG00000145604, ENSG00000117650, ENSG00000170836, ENSG00000134057, ENSG00000183765, ENSG00000170027	187	137	16792	4.58816	0.999825	0.128803	0.125204
100	GOTERM_BP_DIRECT	GO:0010629~negative regulation of gene expression	7	3.60825	0.0042303	ENSG00000136826, ENSG00000135503, ENSG00000105329, ENSG00000232810, ENSG00000096717, ENSG00000134057, ENSG00000181690	187	137	16792	4.58816	0.999825	0.128803	0.125204
101	KEGG_PATHWAY	hsa04010:MAPK signaling pathway	12	6.18557	0.00449119	ENSG00000120875, ENSG00000158050, ENSG00000106799, ENSG00000197461, ENSG00000197442, ENSG00000105329, ENSG00000232810, ENSG00000107968, ENSG00000166484, ENSG00000115008, ENSG00000172575, ENSG00000170345	121	253	6879	2.6965	0.595362	0.0559069	0.0520129
102	KEGG_PATHWAY	hsa05166:HTLV-I infection	12	6.18557	0.00462632	ENSG00000175054, ENSG00000106799, ENSG00000197461, ENSG00000126561, ENSG00000105329, ENSG00000232810, ENSG00000162104, ENSG00000087088, ENSG00000007968, ENSG00000170345, ENSG00000183765, ENSG00000164930	121	254	6879	2.68589	0.606253	0.0559069	0.0520129
103	GOTERM_MF_DIRECT	GO:0000900~translation repressor activity, nucleic acid binding	3	1.54639	0.0047062	ENSG00000107864, ENSG00000214575, ENSG00000137449	179	10	16881	28.2922	0.872732	0.10283	0.0985948
104	KEGG_PATHWAY	hsa04932:Non-alcoholic fatty liver disease (NAFLD)	9	4.63918	0.00472845	ENSG00000160712, ENSG00000197442, ENSG00000105329, ENSG00000232810, ENSG00000115008, ENSG00000087088, ENSG00000169021, ENSG00000116678, ENSG00000204370	121	151	6879	3.38848	0.614291	0.0559069	0.0520129
105	GOTERM_BP_DIRECT	GO:0043507~positive regulation of JUN kinase activity	4	2.06186	0.00478494	ENSG00000197442, ENSG00000120899, ENSG00000232810, ENSG00000130758	187	31	16792	11.5867	0.999944	0.143548	0.139537
106	GOTERM_BP_DIRECT	GO:0006977~DNA damage response, signal transduction by p53 class mediator resulting in cell cycle arrest	5	2.57732	0.00493025	ENSG00000185499, ENSG00000087088, ENSG00000134057, ENSG00000116017, ENSG00000183765	187	62	16792	7.24168	0.999958	0.143862	0.139842
107	GOTERM_BP_DIRECT	GO:0006468~protein phosphorylation	13	6.70103	0.00493643	ENSG00000106799, ENSG00000135503, ENSG00000135828, ENSG00000197442, ENSG00000105329, ENSG00000107968, ENSG00000250506, ENSG00000152256, ENSG00000117650, ENSG00000027075, ENSG00000120899, ENSG00000108691, ENSG00000183765	187	456	16792	2.56	0.999959	0.143862	0.139842
108	GOTERM_BP_DIRECT	GO:0051272~positive regulation of cellular component movement	3	1.54639	0.00517989	ENSG00000113916, ENSG00000151694, ENSG00000106799	187	10	16792	26.939	0.999975	0.144382	0.140348
109	GOTERM_BP_DIRECT	GO:0042118~endothelial cell activation	3	1.54639	0.00517989	ENSG00000196628, ENSG00000106799, ENSG00000078399	187	10	16792	26.939	0.999975	0.144382	0.140348
110	GOTERM_BP_DIRECT	GO:0031663~lipopolysaccharide-mediated signaling pathway	4	2.06186	0.00523739	ENSG00000136869, ENSG00000105329, ENSG00000232810, ENSG00000108691	187	32	16792	11.2246	0.999978	0.144382	0.140348
111	GOTERM_BP_DIRECT	GO:0042220~response to cocaine	4	2.06186	0.00523739	ENSG00000088305, ENSG00000120899, ENSG00000180914, ENSG00000112038	187	32	16792	11.2246	0.999978	0.144382	0.140348
112	GOTERM_MF_DIRECT	GO:0035925~mRNA 3'-UTR AU-rich region binding	3	1.54639	0.0057123	ENSG00000107864, ENSG00000214575, ENSG00000137449	179	11	16881	25.7202	0.918196	0.11887	0.113974
113	GOTERM_BP_DIRECT	GO:0010718~positive regulation of epithelial to mesenchymal transition	4	2.06186	0.00571474	ENSG00000106799, ENSG00000105329, ENSG00000153071, ENSG00000148400	187	33	16792	10.8845	0.999992	0.153396	0.14911
114	GOTERM_BP_DIRECT	GO:0043491~protein kinase B signaling	4	2.06186	0.00571474	ENSG00000105329, ENSG00000232810, ENSG00000133056, ENSG00000108691	187	33	16792	10.8845	0.999992	0.153396	0.14911
115	GOTERM_BP_DIRECT	GO:0001837~epithelial to mesenchymal transition	4	2.06186	0.00621734	ENSG00000106799, ENSG00000105329, ENSG00000148400, ENSG00000069702	187	34	16792	10.5643	0.999997	0.160269	0.155791
116	GOTERM_BP_DIRECT	GO:0034116~positive regulation of heterotypic cell-cell adhesion	3	1.54639	0.00628504	ENSG00000232810, ENSG00000136634, ENSG00000137312	187	11	16792	24.49	0.999997	0.160269	0.155791
117	GOTERM_BP_DIRECT	GO:0090051~negative regulation of cell migration involved in sprouting angiogenesis	3	1.54639	0.00628504	ENSG00000136826, ENSG00000106511, ENSG00000148400	187	11	16792	24.49	0.999997	0.160269	0.155791
118	GOTERM_BP_DIRECT	GO:0032700~negative regulation of interleukin-17 production	3	1.54639	0.00628504	ENSG00000136869, ENSG00000105329, ENSG00000168811	187	11	16792	24.49	0.999997	0.160269	0.155791
119	GOTERM_BP_DIRECT	GO:0048565~digestive tract development	4	2.06186	0.00674552	ENSG00000179348, ENSG00000105329, ENSG00000134057, ENSG00000180914	187	35	16792	10.2625	0.999999	0.169887	0.16514
120	GOTERM_BP_DIRECT	GO:0001938~positive regulation of endothelial cell proliferation	5	2.57732	0.00719762	ENSG00000106799, ENSG00000126561, ENSG00000096717, ENSG00000108691, ENSG00000118257	187	69	16792	6.50701	1	0.179063	0.17406
121	GOTERM_BP_DIRECT	GO:0043407~negative regulation of MAP kinase activity	4	2.06186	0.00729959	ENSG00000164056, ENSG00000166484, ENSG00000187678, ENSG00000136158	187	36	16792	9.97742	1	0.179412	0.174399
122	GOTERM_MF_DIRECT	GO:0008083~growth factor activity	7	3.60825	0.0074478	ENSG00000197461, ENSG00000113070, ENSG00000105329, ENSG00000157168, ENSG00000183742, ENSG00000136634, ENSG00000168811	179	162	16881	4.07501	0.961874	0.14566	0.13966
123	GOTERM_BP_DIRECT	GO:2000010~positive regulation of protein localization to cell surface	3	1.54639	0.00748739	ENSG00000232810, ENSG00000157168, ENSG00000152642	187	12	16792	22.4492	1	0.181837	0.176756
124	GOTERM_MF_DIRECT	GO:0005524~ATP binding	27	13.9175	0.0076663	ENSG00000024422, ENSG00000135503, ENSG00000135828, ENSG00000130758, ENSG00000119383, ENSG00000250506, ENSG00000184182, ENSG00000117650, ENSG00000027075, ENSG00000120899, ENSG00000121989, ENSG00000160179, ENSG00000175054, ENSG00000106799, ENSG00000114739, ENSG00000197442, ENSG00000107968, ENSG00000133056, ENSG00000152256, ENSG00000051180, ENSG00000100714, ENSG00000138182, ENSG00000166165, ENSG0000…	179	1495	16881	1.70321	0.965372	0.14566	0.13966
125	GOTERM_BP_DIRECT	GO:2001240~negative regulation of extrinsic apoptotic signaling pathway in absence of ligand	4	2.06186	0.00787985	ENSG00000232810, ENSG00000166484, ENSG00000115008, ENSG00000157168	187	37	16792	9.70776	1	0.189116	0.183832
126	GOTERM_BP_DIRECT	GO:0048010~vascular endothelial growth factor receptor signaling pathway	5	2.57732	0.00834944	ENSG00000120899, ENSG00000102755, ENSG00000089159, ENSG00000108691, ENSG00000118257	187	72	16792	6.23589	1	0.198057	0.192523
127	GOTERM_BP_DIRECT	GO:0060317~cardiac epithelial to mesenchymal transition	3	1.54639	0.00878465	ENSG00000106799, ENSG00000148400, ENSG00000069702	187	13	16792	20.7223	1	0.203644	0.197954
128	GOTERM_BP_DIRECT	GO:0060391~positive regulation of SMAD protein import into nucleus	3	1.54639	0.00878465	ENSG00000106799, ENSG00000105329, ENSG00000153071	187	13	16792	20.7223	1	0.203644	0.197954
129	GOTERM_BP_DIRECT	GO:0010628~positive regulation of gene expression	9	4.63918	0.00891905	ENSG00000136826, ENSG00000136869, ENSG00000106799, ENSG00000088305, ENSG00000105329, ENSG00000232810, ENSG00000115008, ENSG00000136158, ENSG00000181690	187	262	16792	3.08462	1	0.204437	0.198724
130	GOTERM_BP_DIRECT	GO:0048704~embryonic skeletal system morphogenesis	4	2.06186	0.00911999	ENSG00000106004, ENSG00000119042, ENSG00000126778, ENSG00000120068	187	39	16792	9.20993	1	0.20672	0.200944
131	GOTERM_BP_DIRECT	GO:0042981~regulation of apoptotic process	8	4.12371	0.00975207	ENSG00000113916, ENSG00000125618, ENSG00000145604, ENSG00000102837, ENSG00000129473, ENSG00000105329, ENSG00000087088, ENSG00000142864	187	213	16792	3.37265	1	0.218618	0.212509
132	GOTERM_BP_DIRECT	GO:0060021~palate development	5	2.57732	0.0100642	ENSG00000106511, ENSG00000106799, ENSG00000114739, ENSG00000119042, ENSG00000069702	187	76	16792	5.90768	1	0.219764	0.213623
133	GOTERM_BP_DIRECT	GO:0030509~BMP signaling pathway	5	2.57732	0.0100642	ENSG00000114739, ENSG00000163430, ENSG00000121989, ENSG00000101665, ENSG00000069702	187	76	16792	5.90768	1	0.219764	0.213623
134	GOTERM_BP_DIRECT	GO:0010801~negative regulation of peptidyl-threonine phosphorylation	3	1.54639	0.0101746	ENSG00000136158, ENSG00000198369, ENSG00000101665	187	14	16792	19.2422	1	0.219764	0.213623
135	GOTERM_BP_DIRECT	GO:0007568~aging	7	3.60825	0.0102341	ENSG00000105329, ENSG00000142082, ENSG00000108691, ENSG00000170345, ENSG00000136634, ENSG00000198947, ENSG00000145335	187	165	16792	3.80956	1	0.219764	0.213623
136	GOTERM_MF_DIRECT	GO:0046332~SMAD binding	4	2.06186	0.0104428	ENSG00000106799, ENSG00000135503, ENSG00000153071, ENSG00000069702	179	43	16881	8.77277	0.989822	0.183092	0.17555
137	GOTERM_MF_DIRECT	GO:0046982~protein heterodimerization activity	12	6.18557	0.0104744	ENSG00000196628, ENSG00000197461, ENSG00000129473, ENSG00000105329, ENSG00000148400, ENSG00000160179, ENSG00000119383, ENSG00000087088, ENSG00000170345, ENSG00000176171, ENSG00000137312, ENSG00000168811	179	465	16881	2.43374	0.989963	0.183092	0.17555
138	GOTERM_BP_DIRECT	GO:0032869~cellular response to insulin stimulus	5	2.57732	0.0105258	ENSG00000214575, ENSG00000048052, ENSG00000108691, ENSG00000137449, ENSG00000170027	187	77	16792	5.83096	1	0.221314	0.21513
139	GOTERM_BP_DIRECT	GO:0001843~neural tube closure	5	2.57732	0.0105258	ENSG00000100714, ENSG00000108518, ENSG00000138182, ENSG00000105329, ENSG00000164930	187	77	16792	5.83096	1	0.221314	0.21513
140	GOTERM_BP_DIRECT	GO:0006915~apoptotic process	14	7.21649	0.0106317	ENSG00000106799, ENSG00000196470, ENSG00000130758, ENSG00000107968, ENSG00000115008, ENSG00000172059, ENSG00000120899, ENSG00000121966, ENSG00000104081, ENSG00000153071, ENSG00000087088, ENSG00000126778, ENSG00000176171, ENSG00000145335	187	567	16792	2.2172	1	0.221314	0.21513
141	KEGG_PATHWAY	hsa05206:MicroRNAs in cancer	12	6.18557	0.0109594	ENSG00000156103, ENSG00000197461, ENSG00000129473, ENSG00000088305, ENSG00000104081, ENSG00000166484, ENSG00000148400, ENSG00000096717, ENSG00000136158, ENSG00000007968, ENSG00000206075, ENSG00000175305	121	286	6879	2.38537	0.890846	0.118061	0.109838
142	KEGG_PATHWAY	hsa04320:Dorso-ventral axis formation	4	2.06186	0.01116	ENSG00000107864, ENSG00000214575, ENSG00000148400, ENSG00000137449	121	27	6879	8.42241	0.895208	0.118061	0.109838
143	GOTERM_BP_DIRECT	GO:0045599~negative regulation of fat cell differentiation	4	2.06186	0.0111828	ENSG00000179348, ENSG00000105329, ENSG00000232810, ENSG00000096717	187	42	16792	8.55208	1	0.230433	0.223995
144	GOTERM_BP_DIRECT	GO:0034260~negative regulation of GTPase activity	4	2.06186	0.0119252	ENSG00000164056, ENSG00000136158, ENSG00000137449, ENSG00000066777	187	43	16792	8.35319	1	0.242221	0.235453
145	GOTERM_BP_DIRECT	GO:0042060~wound healing	5	2.57732	0.0119923	ENSG00000106799, ENSG00000197461, ENSG00000197442, ENSG00000157168, ENSG00000112038	187	80	16792	5.6123	1	0.242221	0.235453
146	GOTERM_MF_DIRECT	GO:0001190~transcriptional activator activity, RNA polymerase II transcription factor binding	3	1.54639	0.0120399	ENSG00000136826, ENSG00000148400, ENSG00000134852	179	16	16881	17.6826	0.994975	0.202363	0.194027
147	GOTERM_BP_DIRECT	GO:0046777~protein autophosphorylation	7	3.60825	0.0123794	ENSG00000175054, ENSG00000117650, ENSG00000135503, ENSG00000120899, ENSG00000130758, ENSG00000102755, ENSG00000183765	187	172	16792	3.65452	1	0.247588	0.24067
148	GOTERM_BP_DIRECT	GO:0023014~signal transduction by protein phosphorylation	4	2.06186	0.0126954	ENSG00000106799, ENSG00000114739, ENSG00000135503, ENSG00000121989	187	44	16792	8.16334	1	0.249838	0.242858
149	GOTERM_BP_DIRECT	GO:0018105~peptidyl-serine phosphorylation	6	3.09278	0.0127369	ENSG00000175054, ENSG00000106799, ENSG00000027075, ENSG00000130758, ENSG00000166484, ENSG00000183765	187	125	16792	4.31025	1	0.249838	0.242858
150	GOTERM_BP_DIRECT	GO:0003222~ventricular trabecula myocardium morphogenesis	3	1.54639	0.0132239	ENSG00000106799, ENSG00000148400, ENSG00000157168	187	16	16792	16.8369	1	0.256921	0.249743
151	GOTERM_MF_DIRECT	GO:0004713~protein tyrosine kinase activity	6	3.09278	0.0134115	ENSG00000126561, ENSG00000113070, ENSG00000120899, ENSG00000130758, ENSG00000102755, ENSG00000157168	179	133	16881	4.25446	0.997262	0.217068	0.208127
152	GOTERM_BP_DIRECT	GO:0030307~positive regulation of cell growth	5	2.57732	0.0141427	ENSG00000151694, ENSG00000106799, ENSG00000113070, ENSG00000120899, ENSG00000157168	187	84	16792	5.34505	1	0.269165	0.261644
153	GOTERM_BP_DIRECT	GO:0009636~response to toxic substance	5	2.57732	0.0147159	ENSG00000051180, ENSG00000088305, ENSG00000087088, ENSG00000170430, ENSG00000170345	187	85	16792	5.28216	1	0.269165	0.261644
154	GOTERM_BP_DIRECT	GO:2000114~regulation of establishment of cell polarity	3	1.54639	0.0148789	ENSG00000138182, ENSG00000120899, ENSG00000066777	187	17	16792	15.8465	1	0.269165	0.261644
155	GOTERM_BP_DIRECT	GO:0001702~gastrulation with mouth forming second	3	1.54639	0.0148789	ENSG00000114739, ENSG00000121989, ENSG00000121481	187	17	16792	15.8465	1	0.269165	0.261644
156	GOTERM_BP_DIRECT	GO:0007178~transmembrane receptor protein serine/threonine kinase signaling pathway	3	1.54639	0.0148789	ENSG00000114739, ENSG00000135503, ENSG00000121989	187	17	16792	15.8465	1	0.269165	0.261644
157	GOTERM_BP_DIRECT	GO:0044849~estrous cycle	3	1.54639	0.0148789	ENSG00000180914, ENSG00000112038, ENSG00000170961	187	17	16792	15.8465	1	0.269165	0.261644
158	GOTERM_MF_DIRECT	GO:0003730~mRNA 3'-UTR binding	4	2.06186	0.0148915	ENSG00000107864, ENSG00000214575, ENSG00000137449, ENSG00000142864	179	49	16881	7.69855	0.998579	0.232414	0.222841
159	GOTERM_BP_DIRECT	GO:0006351~transcription, DNA-templated	33	17.0103	0.0151555	ENSG00000113916, ENSG00000179348, ENSG00000164749, ENSG00000105856, ENSG00000119042, ENSG00000153814, ENSG00000134852, ENSG00000133740, ENSG00000138336, ENSG00000100307, ENSG00000077092, ENSG00000078399, ENSG00000048052, ENSG00000121481, ENSG00000126561, ENSG00000173473, ENSG00000256060, ENSG00000181472, ENSG00000197323, ENSG00000172465, ENSG00000181690, ENSG00000116833, ENSG00000189283, ENSG0000…	187	1955	16792	1.51575	1	0.269165	0.261644
160	GOTERM_BP_DIRECT	GO:0051781~positive regulation of cell division	4	2.06186	0.0151735	ENSG00000197461, ENSG00000105329, ENSG00000115008, ENSG00000183742	187	47	16792	7.64228	1	0.269165	0.261644
161	GOTERM_BP_DIRECT	GO:0032760~positive regulation of tumor necrosis factor production	4	2.06186	0.0151735	ENSG00000136869, ENSG00000016082, ENSG00000172575, ENSG00000108691	187	47	16792	7.64228	1	0.269165	0.261644
162	GOTERM_BP_DIRECT	GO:0009267~cellular response to starvation	4	2.06186	0.0151735	ENSG00000170836, ENSG00000096717, ENSG00000133056, ENSG00000197548	187	47	16792	7.64228	1	0.269165	0.261644
163	GOTERM_BP_DIRECT	GO:0051092~positive regulation of NF-kappaB transcription factor activity	6	3.09278	0.0162741	ENSG00000171206, ENSG00000136869, ENSG00000027075, ENSG00000105329, ENSG00000232810, ENSG00000134852	187	133	16792	4.05098	1	0.2862	0.278203
164	GOTERM_MF_DIRECT	GO:0043022~ribosome binding	4	2.06186	0.0165774	ENSG00000107864, ENSG00000214575, ENSG00000137449, ENSG00000163577	179	51	16881	7.39665	0.999328	0.24461	0.234534
165	GOTERM_BP_DIRECT	GO:0045807~positive regulation of endocytosis	3	1.54639	0.0166181	ENSG00000153071, ENSG00000137312, ENSG00000145335	187	18	16792	14.9661	1	0.287276	0.279249
166	GOTERM_BP_DIRECT	GO:0060037~pharyngeal system development	3	1.54639	0.0166181	ENSG00000016082, ENSG00000106799, ENSG00000126778	187	18	16792	14.9661	1	0.287276	0.279249
167	GOTERM_BP_DIRECT	GO:0007204~positive regulation of cytosolic calcium ion concentration	6	3.09278	0.0167577	ENSG00000179348, ENSG00000198121, ENSG00000120899, ENSG00000121966, ENSG00000180914, ENSG00000112038	187	134	16792	4.02075	1	0.287276	0.279249
168	GOTERM_MF_DIRECT	GO:0003677~DNA binding	28	14.433	0.0167924	ENSG00000106004, ENSG00000105856, ENSG00000119042, ENSG00000007968, ENSG00000170430, ENSG00000134852, ENSG00000133740, ENSG00000077092, ENSG00000185697, ENSG00000126778, ENSG00000160710, ENSG00000125740, ENSG00000175054, ENSG00000126561, ENSG00000173473, ENSG00000175595, ENSG00000181472, ENSG00000197323, ENSG00000116833, ENSG00000116017, ENSG00000170345, ENSG00000119950, ENSG00000051180, ENSG0000…	179	1674	16881	1.57742	0.999389	0.24461	0.234534
169	GOTERM_BP_DIRECT	GO:0071560~cellular response to transforming growth factor beta stimulus	4	2.06186	0.0169664	ENSG00000106799, ENSG00000105329, ENSG00000166484, ENSG00000101665	187	49	16792	7.33035	1	0.288429	0.28037
170	KEGG_PATHWAY	hsa04914:Progesterone-mediated oocyte maturation	6	3.09278	0.0176354	ENSG00000107864, ENSG00000214575, ENSG00000127955, ENSG00000162104, ENSG00000134057, ENSG00000137449	121	87	6879	3.92078	0.972022	0.177236	0.164891
171	GOTERM_BP_DIRECT	GO:0001701~in utero embryonic development	7	3.60825	0.0179961	ENSG00000121039, ENSG00000106799, ENSG00000135503, ENSG00000148400, ENSG00000185499, ENSG00000134057, ENSG00000160710	187	187	16792	3.36138	1	0.303359	0.294882
172	GOTERM_BP_DIRECT	GO:0090190~positive regulation of branching involved in ureteric bud morphogenesis	3	1.54639	0.0184394	ENSG00000125618, ENSG00000105329, ENSG00000126778	187	19	16792	14.1784	1	0.303359	0.294882
173	GOTERM_BP_DIRECT	GO:0045638~negative regulation of myeloid cell differentiation	3	1.54639	0.0184394	ENSG00000078399, ENSG00000120899, ENSG00000120068	187	19	16792	14.1784	1	0.303359	0.294882
174	GOTERM_BP_DIRECT	GO:0045672~positive regulation of osteoclast differentiation	3	1.54639	0.0184394	ENSG00000180694, ENSG00000232810, ENSG00000170345	187	19	16792	14.1784	1	0.303359	0.294882
175	GOTERM_BP_DIRECT	GO:0009887~organ morphogenesis	5	2.57732	0.0191406	ENSG00000179348, ENSG00000197461, ENSG00000173473, ENSG00000108691, ENSG00000133740	187	92	16792	4.88026	1	0.312375	0.303647
176	GOTERM_BP_DIRECT	GO:0007050~cell cycle arrest	6	3.09278	0.0204121	ENSG00000106799, ENSG00000138182, ENSG00000105856, ENSG00000105329, ENSG00000134248, ENSG00000168811	187	141	16792	3.82114	1	0.330481	0.321247
177	GOTERM_MF_DIRECT	GO:0003714~transcription corepressor activity	7	3.60825	0.0207231	ENSG00000196628, ENSG00000088305, ENSG00000130758, ENSG00000096717, ENSG00000153814, ENSG00000048052, ENSG00000119950	179	203	16881	3.25197	0.999894	0.283019	0.271361
178	GOTERM_MF_DIRECT	GO:0017002~activin-activated receptor activity	2	1.03093	0.0209782	ENSG00000135503, ENSG00000121989	179	2	16881	94.3073	0.999905	0.283019	0.271361
179	GOTERM_MF_DIRECT	GO:0046983~protein dimerization activity	6	3.09278	0.0213721	ENSG00000166167, ENSG00000160179, ENSG00000007968, ENSG00000134852, ENSG00000119950, ENSG00000133740	179	150	16881	3.77229	0.999921	0.283019	0.271361
180	GOTERM_BP_DIRECT	GO:0071456~cellular response to hypoxia	5	2.57732	0.0220011	ENSG00000214575, ENSG00000096717, ENSG00000134057, ENSG00000137449, ENSG00000176171	187	96	16792	4.67692	1	0.342357	0.332792
181	GOTERM_BP_DIRECT	GO:0060979~vasculogenesis involved in coronary vascular morphogenesis	2	1.03093	0.0220314	ENSG00000148400, ENSG00000069702	187	2	16792	89.7968	1	0.342357	0.332792
182	GOTERM_BP_DIRECT	GO:1900248~negative regulation of cytoplasmic translational elongation	2	1.03093	0.0220314	ENSG00000107864, ENSG00000137449	187	2	16792	89.7968	1	0.342357	0.332792
183	GOTERM_BP_DIRECT	GO:0055099~response to high density lipoprotein particle	2	1.03093	0.0220314	ENSG00000151694, ENSG00000160179	187	2	16792	89.7968	1	0.342357	0.332792
184	GOTERM_MF_DIRECT	GO:0004709~MAP kinase kinase kinase activity	3	1.54639	0.0222397	ENSG00000197442, ENSG00000130758, ENSG00000107968	179	22	16881	12.8601	0.999946	0.285846	0.274072
185	GOTERM_BP_DIRECT	GO:0035902~response to immobilization stress	3	1.54639	0.0223204	ENSG00000120899, ENSG00000105329, ENSG00000170345	187	21	16792	12.8281	1	0.342357	0.332792
186	GOTERM_BP_DIRECT	GO:0070932~histone H3 deacetylation	3	1.54639	0.0223204	ENSG00000096717, ENSG00000142082, ENSG00000048052	187	21	16792	12.8281	1	0.342357	0.332792
187	GOTERM_BP_DIRECT	GO:0071480~cellular response to gamma radiation	3	1.54639	0.0223204	ENSG00000051180, ENSG00000175054, ENSG00000183765	187	21	16792	12.8281	1	0.342357	0.332792
188	GOTERM_MF_DIRECT	GO:0000982~transcription factor activity, RNA polymerase II core promoter proximal region sequence-specific binding	3	1.54639	0.0241913	ENSG00000170345, ENSG00000134852, ENSG00000125740	179	23	16881	12.3009	0.999977	0.29755	0.285294
189	GOTERM_BP_DIRECT	GO:0060999~positive regulation of dendritic spine development	3	1.54639	0.0243761	ENSG00000107864, ENSG00000198121, ENSG00000157168	187	22	16792	12.245	1	0.371098	0.360729
190	GOTERM_MF_DIRECT	GO:0016874~ligase activity	8	4.12371	0.0245121	ENSG00000184182, ENSG00000166167, ENSG00000171206, ENSG00000167333, ENSG00000196470, ENSG00000197323, ENSG00000007944, ENSG00000121481	179	270	16881	2.79429	0.999981	0.29755	0.285294
191	GOTERM_BP_DIRECT	GO:0006954~inflammatory response	10	5.15464	0.0253025	ENSG00000113916, ENSG00000136869, ENSG00000105329, ENSG00000232810, ENSG00000121966, ENSG00000115008, ENSG00000048052, ENSG00000108691, ENSG00000170345, ENSG00000136634	187	379	16792	2.36931	1	0.382349	0.371666
192	GOTERM_BP_DIRECT	GO:0006355~regulation of transcription, DNA-templated	26	13.4021	0.0263299	ENSG00000016082, ENSG00000135503, ENSG00000105856, ENSG00000119042, ENSG00000007968, ENSG00000134852, ENSG00000198947, ENSG00000077092, ENSG00000078399, ENSG00000160179, ENSG00000148400, ENSG00000185697, ENSG00000126778, ENSG00000106511, ENSG00000106799, ENSG00000114739, ENSG00000181472, ENSG00000116833, ENSG00000189283, ENSG00000119950, ENSG00000125618, ENSG00000101665, ENSG00000183742, ENSG0000…	187	1504	16792	1.55234	1	0.391828	0.38088
193	GOTERM_BP_DIRECT	GO:0016239~positive regulation of macroautophagy	3	1.54639	0.026506	ENSG00000096717, ENSG00000197548, ENSG00000176171	187	23	16792	11.7126	1	0.391828	0.38088
194	GOTERM_BP_DIRECT	GO:0009617~response to bacterium	3	1.54639	0.026506	ENSG00000170836, ENSG00000108691, ENSG00000196776	187	23	16792	11.7126	1	0.391828	0.38088
195	GOTERM_MF_DIRECT	GO:0046872~metal ion binding	32	16.4948	0.0271097	ENSG00000113916, ENSG00000151694, ENSG00000214575, ENSG00000135503, ENSG00000135828, ENSG00000153814, ENSG00000172059, ENSG00000169021, ENSG00000040199, ENSG00000204370, ENSG00000118257, ENSG00000117650, ENSG00000027075, ENSG00000121989, ENSG00000188641, ENSG00000048052, ENSG00000169926, ENSG00000160710, ENSG00000136826, ENSG00000106799, ENSG00000114739, ENSG00000181472, ENSG00000181690, ENSG0000…	179	2069	16881	1.45859	0.999994	0.31513	0.30215
196	GOTERM_BP_DIRECT	GO:0006367~transcription initiation from RNA polymerase II promoter	6	3.09278	0.0271662	ENSG00000196628, ENSG00000077092, ENSG00000164749, ENSG00000148400, ENSG00000116833, ENSG00000007968	187	152	16792	3.54461	1	0.398698	0.387558
197	GOTERM_MF_DIRECT	GO:0042802~identical protein binding	15	7.73196	0.0274026	ENSG00000113916, ENSG00000196470, ENSG00000189283, ENSG00000051180, ENSG00000171206, ENSG00000196628, ENSG00000145604, ENSG00000167772, ENSG00000232810, ENSG00000096717, ENSG00000087088, ENSG00000124788, ENSG00000183765, ENSG00000176171, ENSG00000145335	179	749	16881	1.88866	0.999995	0.31513	0.30215
198	GOTERM_BP_DIRECT	GO:0009612~response to mechanical stimulus	4	2.06186	0.0276388	ENSG00000120899, ENSG00000134057, ENSG00000108691, ENSG00000125740	187	59	16792	6.08792	1	0.400544	0.389352
199	GOTERM_BP_DIRECT	GO:0007283~spermatogenesis	10	5.15464	0.027929	ENSG00000113916, ENSG00000196470, ENSG00000078399, ENSG00000129473, ENSG00000121989, ENSG00000148400, ENSG00000096717, ENSG00000134057, ENSG00000134852, ENSG00000163577	187	385	16792	2.33238	1	0.400544	0.389352
200	GOTERM_BP_DIRECT	GO:0018108~peptidyl-tyrosine phosphorylation	6	3.09278	0.0279981	ENSG00000126561, ENSG00000113070, ENSG00000120899, ENSG00000102755, ENSG00000081985, ENSG00000157168	187	153	16792	3.52144	1	0.400544	0.389352
201	GOTERM_BP_DIRECT	GO:0030511~positive regulation of transforming growth factor beta receptor signaling pathway	3	1.54639	0.0287083	ENSG00000151694, ENSG00000153071, ENSG00000069702	187	24	16792	11.2246	1	0.400544	0.389352
202	GOTERM_BP_DIRECT	GO:0030866~cortical actin cytoskeleton organization	3	1.54639	0.0287083	ENSG00000024422, ENSG00000131899, ENSG00000232810	187	24	16792	11.2246	1	0.400544	0.389352
203	GOTERM_BP_DIRECT	GO:0045648~positive regulation of erythrocyte differentiation	3	1.54639	0.0287083	ENSG00000179348, ENSG00000135503, ENSG00000121989	187	24	16792	11.2246	1	0.400544	0.389352
204	GOTERM_BP_DIRECT	GO:0045669~positive regulation of osteoblast differentiation	4	2.06186	0.0288627	ENSG00000114739, ENSG00000160712, ENSG00000121989, ENSG00000178585	187	60	16792	5.98645	1	0.400544	0.389352
205	GOTERM_BP_DIRECT	GO:0048661~positive regulation of smooth muscle cell proliferation	4	2.06186	0.0288627	ENSG00000145604, ENSG00000160712, ENSG00000113070, ENSG00000232810	187	60	16792	5.98645	1	0.400544	0.389352
206	GOTERM_MF_DIRECT	GO:0001047~core promoter binding	4	2.06186	0.0300482	ENSG00000136826, ENSG00000148400, ENSG00000007968, ENSG00000134852	179	64	16881	5.8942	0.999998	0.325697	0.312281
207	GOTERM_BP_DIRECT	GO:0050715~positive regulation of cytokine secretion	3	1.54639	0.0309812	ENSG00000232810, ENSG00000115008, ENSG00000136634	187	25	16792	10.7756	1	0.418175	0.40649
208	GOTERM_BP_DIRECT	GO:0006306~DNA methylation	3	1.54639	0.0309812	ENSG00000088305, ENSG00000170430, ENSG00000170345	187	25	16792	10.7756	1	0.418175	0.40649
209	GOTERM_BP_DIRECT	GO:0030878~thyroid gland development	3	1.54639	0.0309812	ENSG00000106004, ENSG00000125618, ENSG00000126778	187	25	16792	10.7756	1	0.418175	0.40649
210	GOTERM_BP_DIRECT	GO:0000188~inactivation of MAPK activity	3	1.54639	0.0309812	ENSG00000120875, ENSG00000158050, ENSG00000198369	187	25	16792	10.7756	1	0.418175	0.40649
211	GOTERM_BP_DIRECT	GO:0000187~activation of MAPK activity	5	2.57732	0.0311581	ENSG00000136869, ENSG00000198121, ENSG00000232810, ENSG00000121966, ENSG00000157168	187	107	16792	4.19611	1	0.418175	0.40649
212	GOTERM_MF_DIRECT	GO:0008134~transcription factor binding	8	4.12371	0.0311849	ENSG00000179348, ENSG00000096717, ENSG00000048052, ENSG00000007968, ENSG00000170345, ENSG00000197548, ENSG00000125740, ENSG00000133740	179	284	16881	2.65654	0.999999	0.325697	0.312281
213	GOTERM_MF_DIRECT	GO:0000980~RNA polymerase II distal enhancer sequence-specific DNA binding	4	2.06186	0.0312647	ENSG00000106511, ENSG00000179348, ENSG00000173473, ENSG00000116833	179	65	16881	5.80352	0.999999	0.325697	0.312281
214	GOTERM_MF_DIRECT	GO:0008330~protein tyrosine/threonine phosphatase activity	2	1.03093	0.0313027	ENSG00000120875, ENSG00000158050	179	3	16881	62.8715	0.999999	0.325697	0.312281
215	GOTERM_MF_DIRECT	GO:0031625~ubiquitin protein ligase binding	8	4.12371	0.0323317	ENSG00000184182, ENSG00000135503, ENSG00000166165, ENSG00000121966, ENSG00000101665, ENSG00000189283, ENSG00000183765, ENSG00000164930	179	287	16881	2.62877	0.999999	0.328581	0.315046
216	GOTERM_BP_DIRECT	GO:0002904~positive regulation of B cell apoptotic process	2	1.03093	0.0328653	ENSG00000087088, ENSG00000136634	187	3	16792	59.8645	1	0.421668	0.409886
217	GOTERM_BP_DIRECT	GO:0045213~neurotransmitter receptor metabolic process	2	1.03093	0.0328653	ENSG00000157168, ENSG00000198947	187	3	16792	59.8645	1	0.421668	0.409886
218	GOTERM_BP_DIRECT	GO:0070295~renal water absorption	2	1.03093	0.0328653	ENSG00000165272, ENSG00000170961	187	3	16792	59.8645	1	0.421668	0.409886
219	GOTERM_BP_DIRECT	GO:0060379~cardiac muscle cell myoblast differentiation	2	1.03093	0.0328653	ENSG00000016082, ENSG00000157168	187	3	16792	59.8645	1	0.421668	0.409886
220	GOTERM_BP_DIRECT	GO:0032800~receptor biosynthetic process	2	1.03093	0.0328653	ENSG00000232810, ENSG00000136634	187	3	16792	59.8645	1	0.421668	0.409886
221	GOTERM_BP_DIRECT	GO:0043243~positive regulation of protein complex disassembly	2	1.03093	0.0328653	ENSG00000232810, ENSG00000176171	187	3	16792	59.8645	1	0.421668	0.409886
222	GOTERM_BP_DIRECT	GO:1902263~apoptotic process involved in embryonic digit morphogenesis	2	1.03093	0.0328653	ENSG00000148400, ENSG00000087088	187	3	16792	59.8645	1	0.421668	0.409886
223	GOTERM_BP_DIRECT	GO:0045070~positive regulation of viral genome replication	3	1.54639	0.0333228	ENSG00000148400, ENSG00000116833, ENSG00000160710	187	26	16792	10.3612	1	0.424866	0.412994
224	GOTERM_BP_DIRECT	GO:0009615~response to virus	5	2.57732	0.0339906	ENSG00000232810, ENSG00000121966, ENSG00000160710, ENSG00000134248, ENSG00000168811	187	110	16792	4.08167	1	0.428668	0.416691
225	GOTERM_BP_DIRECT	GO:0042632~cholesterol homeostasis	4	2.06186	0.0340413	ENSG00000096717, ENSG00000160179, ENSG00000007944, ENSG00000116833	187	64	16792	5.6123	1	0.428668	0.416691
226	KEGG_PATHWAY	hsa05152:Tuberculosis	8	4.12371	0.0346916	ENSG00000136869, ENSG00000102879, ENSG00000105329, ENSG00000232810, ENSG00000115008, ENSG00000087088, ENSG00000136634, ENSG00000168811	121	177	6879	2.56955	0.999172	0.332048	0.308921
227	GOTERM_BP_DIRECT	GO:0090090~negative regulation of canonical Wnt signaling pathway	6	3.09278	0.0351977	ENSG00000016082, ENSG00000180694, ENSG00000153071, ENSG00000050165, ENSG00000148400, ENSG00000164930	187	163	16792	3.3054	1	0.439108	0.426839
228	GOTERM_BP_DIRECT	GO:0014068~positive regulation of phosphatidylinositol 3-kinase signaling	4	2.06186	0.0354062	ENSG00000197461, ENSG00000102755, ENSG00000096717, ENSG00000157168	187	65	16792	5.52596	1	0.439108	0.426839
229	GOTERM_BP_DIRECT	GO:0072332~intrinsic apoptotic signaling pathway by p53 class mediator	3	1.54639	0.0357313	ENSG00000087088, ENSG00000007968, ENSG00000189283	187	27	16792	9.97742	1	0.439108	0.426839
230	GOTERM_BP_DIRECT	GO:0010575~positive regulation of vascular endothelial growth factor production	3	1.54639	0.0357313	ENSG00000016082, ENSG00000105329, ENSG00000115008	187	27	16792	9.97742	1	0.439108	0.426839
231	GOTERM_BP_DIRECT	GO:0030183~B cell differentiation	4	2.06186	0.0367991	ENSG00000113916, ENSG00000151694, ENSG00000048052, ENSG00000136634	187	66	16792	5.44223	1	0.448903	0.43636
232	GOTERM_BP_DIRECT	GO:0071222~cellular response to lipopolysaccharide	5	2.57732	0.0369685	ENSG00000136869, ENSG00000232810, ENSG00000108691, ENSG00000136634, ENSG00000168811	187	113	16792	3.97331	1	0.448903	0.43636
233	GOTERM_MF_DIRECT	GO:0008135~translation factor activity, RNA binding	3	1.54639	0.0372607	ENSG00000107864, ENSG00000214575, ENSG00000137449	179	29	16881	9.75592	1	0.370066	0.354823
234	GOTERM_BP_DIRECT	GO:2000352~negative regulation of endothelial cell apoptotic process	3	1.54639	0.038205	ENSG00000167772, ENSG00000166484, ENSG00000136634	187	28	16792	9.62108	1	0.453129	0.440468
235	GOTERM_BP_DIRECT	GO:0000060~protein import into nucleus, translocation	3	1.54639	0.038205	ENSG00000113916, ENSG00000105329, ENSG00000232810	187	28	16792	9.62108	1	0.453129	0.440468
236	GOTERM_BP_DIRECT	GO:0032715~negative regulation of interleukin-6 production	3	1.54639	0.038205	ENSG00000136869, ENSG00000232810, ENSG00000136634	187	28	16792	9.62108	1	0.453129	0.440468
237	GOTERM_BP_DIRECT	GO:0090200~positive regulation of release of cytochrome c from mitochondria	3	1.54639	0.038205	ENSG00000104081, ENSG00000087088, ENSG00000176171	187	28	16792	9.62108	1	0.453129	0.440468
238	GOTERM_MF_DIRECT	GO:0005125~cytokine activity	6	3.09278	0.0385241	ENSG00000105329, ENSG00000232810, ENSG00000115008, ENSG00000157168, ENSG00000136634, ENSG00000168811	179	176	16881	3.21502	1	0.374111	0.358702
239	GOTERM_MF_DIRECT	GO:0015026~coreceptor activity	3	1.54639	0.039651	ENSG00000121989, ENSG00000121966, ENSG00000069702	179	30	16881	9.43073	1	0.376684	0.361169
240	GOTERM_BP_DIRECT	GO:0050766~positive regulation of phagocytosis	3	1.54639	0.0407422	ENSG00000179348, ENSG00000232810, ENSG00000196776	187	29	16792	9.28932	1	0.472239	0.459044
241	GOTERM_BP_DIRECT	GO:0048873~homeostasis of number of cells within a tissue	3	1.54639	0.0407422	ENSG00000179348, ENSG00000102879, ENSG00000087088	187	29	16792	9.28932	1	0.472239	0.459044
242	GOTERM_BP_DIRECT	GO:0048662~negative regulation of smooth muscle cell proliferation	3	1.54639	0.0407422	ENSG00000136826, ENSG00000178585, ENSG00000168811	187	29	16792	9.28932	1	0.472239	0.459044
243	GOTERM_BP_DIRECT	GO:0071549~cellular response to dexamethasone stimulus	3	1.54639	0.0407422	ENSG00000088305, ENSG00000105329, ENSG00000108691	187	29	16792	9.28932	1	0.472239	0.459044
244	GOTERM_BP_DIRECT	GO:0071300~cellular response to retinoic acid	4	2.06186	0.0426475	ENSG00000136826, ENSG00000120899, ENSG00000185499, ENSG00000108691	187	70	16792	5.13125	1	0.483168	0.469668
245	GOTERM_BP_DIRECT	GO:0033138~positive regulation of peptidyl-serine phosphorylation	4	2.06186	0.0426475	ENSG00000105329, ENSG00000232810, ENSG00000136158, ENSG00000145335	187	70	16792	5.13125	1	0.483168	0.469668
246	KEGG_PATHWAY	hsa05145:Toxoplasmosis	6	3.09278	0.0427434	ENSG00000136869, ENSG00000105329, ENSG00000232810, ENSG00000127955, ENSG00000136634, ENSG00000168811	121	110	6879	3.10098	0.999846	0.390519	0.363319
247	GOTERM_BP_DIRECT	GO:0007281~germ cell development	3	1.54639	0.0433411	ENSG00000087088, ENSG00000121481, ENSG00000256453	187	30	16792	8.97968	1	0.483168	0.469668
248	GOTERM_BP_DIRECT	GO:0000077~DNA damage checkpoint	3	1.54639	0.0433411	ENSG00000175054, ENSG00000134852, ENSG00000183765	187	30	16792	8.97968	1	0.483168	0.469668
249	GOTERM_BP_DIRECT	GO:0051387~negative regulation of neurotrophin TRK receptor signaling pathway	2	1.03093	0.0435799	ENSG00000164056, ENSG00000136158	187	4	16792	44.8984	1	0.483168	0.469668
250	GOTERM_BP_DIRECT	GO:0071677~positive regulation of mononuclear cell migration	2	1.03093	0.0435799	ENSG00000105329, ENSG00000232810	187	4	16792	44.8984	1	0.483168	0.469668
251	GOTERM_BP_DIRECT	GO:0002248~connective tissue replacement involved in inflammatory response wound healing	2	1.03093	0.0435799	ENSG00000105329, ENSG00000115008	187	4	16792	44.8984	1	0.483168	0.469668
252	GOTERM_BP_DIRECT	GO:0060965~negative regulation of gene silencing by miRNA	2	1.03093	0.0435799	ENSG00000105329, ENSG00000256453	187	4	16792	44.8984	1	0.483168	0.469668
253	GOTERM_BP_DIRECT	GO:0048701~embryonic cranial skeleton morphogenesis	3	1.54639	0.0460002	ENSG00000156103, ENSG00000106799, ENSG00000126778	187	31	16792	8.69001	1	0.50182	0.487799
254	GOTERM_BP_DIRECT	GO:0010332~response to gamma radiation	3	1.54639	0.0460002	ENSG00000087088, ENSG00000108691, ENSG00000183765	187	31	16792	8.69001	1	0.50182	0.487799
255	GOTERM_BP_DIRECT	GO:0043552~positive regulation of phosphatidylinositol 3-kinase activity	3	1.54639	0.0460002	ENSG00000120899, ENSG00000105329, ENSG00000102755	187	31	16792	8.69001	1	0.50182	0.487799
256	GOTERM_MF_DIRECT	GO:0019901~protein kinase binding	9	4.63918	0.0461704	ENSG00000131899, ENSG00000197442, ENSG00000136158, ENSG00000198369, ENSG00000089159, ENSG00000134057, ENSG00000081985, ENSG00000183765, ENSG00000175305	179	376	16881	2.25735	1	0.429287	0.411604
257	GOTERM_BP_DIRECT	GO:0050729~positive regulation of inflammatory response	4	2.06186	0.0473206	ENSG00000136869, ENSG00000108691, ENSG00000196776, ENSG00000134852	187	73	16792	4.92037	1	0.513479	0.499132
258	GOTERM_MF_DIRECT	GO:0061630~ubiquitin protein ligase activity	6	3.09278	0.0482685	ENSG00000184182, ENSG00000166167, ENSG00000145604, ENSG00000196470, ENSG00000007944, ENSG00000121481	179	187	16881	3.0259	1	0.439444	0.421344
259	GOTERM_BP_DIRECT	GO:0006397~mRNA processing	6	3.09278	0.0492061	ENSG00000214575, ENSG00000135828, ENSG00000134748, ENSG00000076770, ENSG00000160710, ENSG00000092208	187	179	16792	3.00995	1	0.531114	0.516274

## Sheet: Affected_gene_annotations
	Category	Term	Count	%	PValue	Genes	List Total	Pop Hits	Pop Total	Fold Enrichment	Bonferroni	Benjamini	FDR
1	KEGG_PATHWAY	hsa05161:Hepatitis B	6	35.2941	6.6717e-06	IL6, CASP8, CDK6, CCND1, MYC, STAT3	15	145	6879	18.9766	0.00064028	0.000640483	0.000547079
2	GOTERM_MF_DIRECT	GO:0005515~protein binding	17	100	2.87508e-05	APP, STAT3, HMGA1, HMGA2, TNFRSF10B, DICER1, ACTG1, IL6, PKM, CASP8, CDK6, CCND1, EWSR1, MYC, AGO1, MYH9, MAP4K4	17	8785	16881	1.92157	0.00332959	0.00333509	0.00316259
3	GOTERM_BP_DIRECT	GO:0032355~response to estradiol	4	23.5294	8.19262e-05	CASP8, CCND1, MYC, STAT3	17	91	16792	43.4182	0.0392716	0.0204391	0.0195613
4	GOTERM_BP_DIRECT	GO:0010628~positive regulation of gene expression	5	29.4118	9.09349e-05	IL6, CDK6, MYC, STAT3, HMGA2	17	262	16792	18.8505	0.0434949	0.0204391	0.0195613
5	KEGG_PATHWAY	hsa05162:Measles	5	29.4118	0.000115033	IL6, CDK6, CCND1, STAT3, TNFRSF10B	15	133	6879	17.2406	0.010983	0.00552157	0.00471634
6	GOTERM_MF_DIRECT	GO:0008134~transcription factor binding	5	29.4118	0.000121691	CCND1, MYC, STAT3, HMGA1, HMGA2	17	284	16881	17.4824	0.0140179	0.00705809	0.00669302
7	GOTERM_BP_DIRECT	GO:0045471~response to ethanol	4	23.5294	0.000125393	CASP8, CCND1, MYC, STAT3	17	105	16792	37.6291	0.0594788	0.0204391	0.0195613
8	KEGG_PATHWAY	hsa05206:MicroRNAs in cancer	6	35.2941	0.000176222	CDK6, CCND1, MYC, STAT3, HMGA2, DICER1	15	286	6879	9.62098	0.0167765	0.0056391	0.00481673
9	GOTERM_BP_DIRECT	GO:0045944~positive regulation of transcription from RNA polymerase II promoter	7	41.1765	0.000188784	APP, IL6, MYC, AGO1, STAT3, HMGA1, HMGA2	17	981	16792	7.04827	0.0881905	0.0230789	0.0220877
10	KEGG_PATHWAY	hsa05203:Viral carcinogenesis	5	29.4118	0.000606145	PKM, CASP8, CDK6, CCND1, STAT3	15	205	6879	11.1854	0.0565459	0.0145475	0.012426
11	GOTERM_BP_DIRECT	GO:0043066~negative regulation of apoptotic process	5	29.4118	0.000747223	IL6, MYC, STAT3, HMGA2, MAP4K4	17	455	16792	10.8546	0.30617	0.0730784	0.0699401
12	KEGG_PATHWAY	hsa05200:Pathways in cancer	6	35.2941	0.000772755	IL6, CASP8, CDK6, CCND1, MYC, STAT3	15	393	6879	7.00153	0.0715262	0.0148369	0.0126732
13	GOTERM_BP_DIRECT	GO:0045893~positive regulation of transcription, DNA-templated	5	29.4118	0.00118637	IL6, MYC, STAT3, HMGA1, HMGA2	17	515	16792	9.58995	0.440371	0.0966895	0.0925372
14	GOTERM_BP_DIRECT	GO:0090402~oncogene-induced cell senescence	2	11.7647	0.00190482	HMGA1, HMGA2	17	2	16792	987.765	0.60637	0.133065	0.127351
15	GOTERM_BP_DIRECT	GO:0042493~response to drug	4	23.5294	0.00276219	IL6, CCND1, MYC, STAT3	17	304	16792	12.9969	0.741428	0.139656	0.133659
16	KEGG_PATHWAY	hsa04630:Jak-STAT signaling pathway	4	23.5294	0.00281556	IL6, CCND1, MYC, STAT3	15	145	6879	12.651	0.237136	0.045049	0.0384793
17	GOTERM_BP_DIRECT	GO:0035986~senescence-associated heterochromatin focus assembly	2	11.7647	0.00285595	HMGA1, HMGA2	17	3	16792	658.51	0.753047	0.139656	0.133659
18	GOTERM_BP_DIRECT	GO:1990646~cellular response to prolactin	2	11.7647	0.00285595	IL6, MYC	17	3	16792	658.51	0.753047	0.139656	0.133659
19	GOTERM_BP_DIRECT	GO:0000320~re-entry into mitotic cell cycle	2	11.7647	0.00380623	CCND1, MYC	17	4	16792	493.882	0.845073	0.162641	0.155657
20	GOTERM_BP_DIRECT	GO:0000122~negative regulation of transcription from RNA polymerase II promoter	5	29.4118	0.00403721	CCND1, MYC, STAT3, HMGA2, DICER1	17	720	16792	6.85948	0.861681	0.162641	0.155657
21	KEGG_PATHWAY	hsa05202:Transcriptional misregulation in cancer	4	23.5294	0.00420028	IL6, EWSR1, MYC, HMGA2	15	167	6879	10.9844	0.332407	0.0576038	0.0492033
22	GOTERM_MF_DIRECT	GO:0042802~identical protein binding	5	29.4118	0.0045635	APP, CASP8, EWSR1, STAT3, ACTG1	17	749	16881	6.62884	0.411735	0.137189	0.130093
23	GOTERM_MF_DIRECT	GO:0051575~5'-deoxyribose-5-phosphate lyase activity	2	11.7647	0.00473064	HMGA1, HMGA2	17	5	16881	397.2	0.423083	0.137189	0.130093
24	GOTERM_BP_DIRECT	GO:0009615~response to virus	3	17.6471	0.00480592	CDK6, HMGA1, HMGA2	17	110	16792	26.939	0.905179	0.162641	0.155657
25	GOTERM_BP_DIRECT	GO:0007219~Notch signaling pathway	3	17.6471	0.0052403	APP, CDK6, MYC	17	115	16792	25.7678	0.923407	0.162641	0.155657
26	KEGG_PATHWAY	hsa05221:Acute myeloid leukemia	3	17.6471	0.00556333	CCND1, MYC, STAT3	15	56	6879	24.5679	0.414665	0.0614287	0.0524703
27	GOTERM_BP_DIRECT	GO:2001171~positive regulation of ATP biosynthetic process	2	11.7647	0.00570425	MYC, STAT3	17	6	16792	329.255	0.93903	0.162641	0.155657
28	KEGG_PATHWAY	hsa05416:Viral myocarditis	3	17.6471	0.00575894	CASP8, CCND1, ACTG1	15	57	6879	24.1368	0.425615	0.0614287	0.0524703
29	GOTERM_BP_DIRECT	GO:0008285~negative regulation of cell proliferation	4	23.5294	0.00580031	IL6, CDK6, STAT3, HMGA1	17	396	16792	9.97742	0.941843	0.162641	0.155657
30	GOTERM_BP_DIRECT	GO:0035280~miRNA loading onto RISC involved in gene silencing by miRNA	2	11.7647	0.00665199	AGO1, DICER1	17	7	16792	282.218	0.961753	0.162641	0.155657
31	GOTERM_BP_DIRECT	GO:0045656~negative regulation of monocyte differentiation	2	11.7647	0.00665199	CDK6, MYC	17	7	16792	282.218	0.961753	0.162641	0.155657
32	GOTERM_BP_DIRECT	GO:0044321~response to leptin	2	11.7647	0.00665199	CCND1, STAT3	17	7	16792	282.218	0.961753	0.162641	0.155657
33	GOTERM_BP_DIRECT	GO:1904628~cellular response to phorbol 13-acetate 12-myristate	2	11.7647	0.00665199	CDK6, MYC	17	7	16792	282.218	0.961753	0.162641	0.155657
34	KEGG_PATHWAY	hsa05205:Proteoglycans in cancer	4	23.5294	0.00695363	CCND1, MYC, STAT3, ACTG1	15	200	6879	9.172	0.48823	0.0630877	0.0538874
35	KEGG_PATHWAY	hsa05212:Pancreatic cancer	3	17.6471	0.00743598	CDK6, CCND1, STAT3	15	65	6879	21.1662	0.511551	0.0630877	0.0538874
36	GOTERM_MF_DIRECT	GO:0003680~AT DNA binding	2	11.7647	0.00755895	HMGA1, HMGA2	17	8	16881	248.25	0.585287	0.175368	0.166297
37	GOTERM_BP_DIRECT	GO:0035196~production of miRNAs involved in gene silencing by miRNA	2	11.7647	0.00759888	AGO1, DICER1	17	8	16792	246.941	0.976008	0.168902	0.161649
38	GOTERM_BP_DIRECT	GO:2000774~positive regulation of cellular senescence	2	11.7647	0.00759888	HMGA1, HMGA2	17	8	16792	246.941	0.976008	0.168902	0.161649
39	KEGG_PATHWAY	hsa04115:p53 signaling pathway	3	17.6471	0.00788597	CASP8, CDK6, CCND1	15	67	6879	20.5343	0.532359	0.0630877	0.0538874
40	GOTERM_BP_DIRECT	GO:0070102~interleukin-6-mediated signaling pathway	2	11.7647	0.00854493	IL6, STAT3	17	9	16792	219.503	0.984951	0.174426	0.166935
41	GOTERM_BP_DIRECT	GO:0006468~protein phosphorylation	4	23.5294	0.00856079	APP, CDK6, CCND1, MAP4K4	17	456	16792	8.6646	0.985068	0.174426	0.166935
42	KEGG_PATHWAY	hsa05220:Chronic myeloid leukemia	3	17.6471	0.00906371	CDK6, CCND1, MYC	15	72	6879	19.1083	0.582756	0.066932	0.0571711
43	GOTERM_BP_DIRECT	GO:2001022~positive regulation of response to DNA damage stimulus	2	11.7647	0.00949013	MYC, HMGA2	17	10	16792	197.553	0.99056	0.185627	0.177655
44	GOTERM_MF_DIRECT	GO:0005524~ATP binding	6	35.2941	0.0103079	PKM, CDK6, MYH9, DICER1, ACTG1, MAP4K4	17	1495	16881	3.98528	0.699385	0.18756	0.177859
45	GOTERM_MF_DIRECT	GO:0003906~DNA-(apurinic or apyrimidinic site) lyase activity	2	11.7647	0.0113183	HMGA1, HMGA2	17	12	16881	165.5	0.732974	0.18756	0.177859
46	GOTERM_BP_DIRECT	GO:0035278~miRNA mediated inhibition of translation	2	11.7647	0.011378	AGO1, STAT3	17	12	16792	164.627	0.996286	0.207752	0.19883
47	GOTERM_BP_DIRECT	GO:0031054~pre-miRNA processing	2	11.7647	0.0123207	AGO1, DICER1	17	13	16792	151.964	0.997671	0.207752	0.19883
48	GOTERM_BP_DIRECT	GO:0001878~response to yeast	2	11.7647	0.0123207	APP, IL6	17	13	16792	151.964	0.997671	0.207752	0.19883
49	GOTERM_BP_DIRECT	GO:0097296~activation of cysteine-type endopeptidase activity involved in apoptotic signaling pathway	2	11.7647	0.0123207	CASP8, TNFRSF10B	17	13	16792	151.964	0.997671	0.207752	0.19883
50	KEGG_PATHWAY	hsa05222:Small cell lung cancer	3	17.6471	0.0124699	CDK6, CCND1, MYC	15	85	6879	16.1859	0.700198	0.0855077	0.0730378
51	GOTERM_MF_DIRECT	GO:0032403~protein complex binding	3	17.6471	0.0158912	CASP8, CCND1, MYC	17	206	16881	14.4612	0.844045	0.230261	0.218351
52	GOTERM_BP_DIRECT	GO:1902041~regulation of extrinsic apoptotic signaling pathway via death domain receptors	2	11.7647	0.0160829	CASP8, TNFRSF10B	17	17	16792	116.208	0.99964	0.262151	0.250893
53	GOTERM_BP_DIRECT	GO:0010971~positive regulation of G2/M transition of mitotic cell cycle	2	11.7647	0.0170214	APP, CCND1	17	18	16792	109.752	0.999774	0.268498	0.256968
54	GOTERM_MF_DIRECT	GO:0004521~endoribonuclease activity	2	11.7647	0.0178651	AGO1, DICER1	17	19	16881	104.526	0.876447	0.230261	0.218351
55	GOTERM_MF_DIRECT	GO:0001077~transcriptional activator activity, RNA polymerase II core promoter proximal region sequence-specific binding	3	17.6471	0.0205283	MYC, STAT3, HMGA2	17	236	16881	12.6229	0.90983	0.238128	0.225811
56	KEGG_PATHWAY	hsa04919:Thyroid hormone signaling pathway	3	17.6471	0.0221137	CCND1, MYC, ACTG1	15	115	6879	11.9635	0.883135	0.141528	0.120888
57	GOTERM_BP_DIRECT	GO:0040014~regulation of multicellular organism growth	2	11.7647	0.0244989	APP, STAT3	17	26	16792	75.9819	0.999995	0.374374	0.358296
58	KEGG_PATHWAY	hsa04110:Cell cycle	3	17.6471	0.02546	CDK6, CCND1, MYC	15	124	6879	11.0952	0.915905	0.15276	0.130482
59	GOTERM_BP_DIRECT	GO:0097421~liver regeneration	2	11.7647	0.0272892	CCND1, MYC	17	29	16792	68.1217	0.999999	0.404376	0.38701
60	KEGG_PATHWAY	hsa04068:FoxO signaling pathway	3	17.6471	0.0294076	IL6, CCND1, STAT3	15	134	6879	10.2672	0.943044	0.160737	0.137296
61	GOTERM_BP_DIRECT	GO:0046677~response to antibiotic	2	11.7647	0.030072	IL6, CASP8	17	32	16792	61.7353	1	0.432506	0.413932
62	KEGG_PATHWAY	hsa04151:PI3K-Akt signaling pathway	4	23.5294	0.0301382	IL6, CDK6, CCND1, MYC	15	345	6879	5.3171	0.947016	0.160737	0.137296
63	GOTERM_MF_DIRECT	GO:0043531~ADP binding	2	11.7647	0.0308368	PKM, MYH9	17	33	16881	60.1818	0.973574	0.325189	0.308368
64	GOTERM_BP_DIRECT	GO:1902042~negative regulation of extrinsic apoptotic signaling pathway via death domain receptors	2	11.7647	0.030998	CASP8, TNFRSF10B	17	33	16792	59.8645	1	0.433086	0.414487
65	GOTERM_BP_DIRECT	GO:0045787~positive regulation of cell cycle	2	11.7647	0.0319231	CCND1, MYC	17	34	16792	58.1038	1	0.433622	0.415
66	GOTERM_BP_DIRECT	GO:0006284~base-excision repair	2	11.7647	0.0328474	HMGA1, HMGA2	17	35	16792	56.4437	1	0.434118	0.415475
67	GOTERM_BP_DIRECT	GO:0009409~response to cold	2	11.7647	0.0337708	IL6, CASP8	17	36	16792	54.8758	1	0.434577	0.415914
68	GOTERM_BP_DIRECT	GO:0042517~positive regulation of tyrosine phosphorylation of Stat3 protein	2	11.7647	0.0356153	IL6, STAT3	17	38	16792	51.9876	1	0.446561	0.427383
69	GOTERM_BP_DIRECT	GO:0006953~acute-phase response	2	11.7647	0.0365363	IL6, STAT3	17	39	16792	50.6546	1	0.446656	0.427474
70	KEGG_PATHWAY	hsa04390:Hippo signaling pathway	3	17.6471	0.0366462	CCND1, MYC, ACTG1	15	151	6879	9.11126	0.972239	0.18516	0.158157
71	GOTERM_BP_DIRECT	GO:1901215~negative regulation of neuron death	2	11.7647	0.0374564	IL6, STAT3	17	40	16792	49.3882	1	0.446736	0.427551
72	GOTERM_BP_DIRECT	GO:0070527~platelet aggregation	2	11.7647	0.0383757	MYH9, ACTG1	17	41	16792	48.1836	1	0.446803	0.427615
73	GOTERM_MF_DIRECT	GO:0019899~enzyme binding	3	17.6471	0.0388002	APP, CCND1, HMGA1	17	333	16881	8.94595	0.989852	0.375069	0.355668
74	GOTERM_BP_DIRECT	GO:0051301~cell division	3	17.6471	0.0428798	CDK6, CCND1, HMGA2	17	350	16792	8.46655	1	0.487633	0.466692
75	GOTERM_MF_DIRECT	GO:0000978~RNA polymerase II core promoter proximal region sequence-specific DNA binding	3	17.6471	0.0435762	MYC, AGO1, STAT3	17	355	16881	8.39155	0.994306	0.388833	0.368721
76	KEGG_PATHWAY	hsa05164:Influenza A	3	17.6471	0.0474253	IL6, TNFRSF10B, ACTG1	15	174	6879	7.9069	0.990574	0.227642	0.194444
77	GOTERM_BP_DIRECT	GO:0030178~negative regulation of Wnt signaling pathway	2	11.7647	0.0484342	CCND1, HMGA2	17	52	16792	37.991	1	0.52969	0.506942
78	GOTERM_BP_DIRECT	GO:0006355~regulation of transcription, DNA-templated	5	29.4118	0.0487444	EWSR1, MYC, STAT3, HMGA1, HMGA2	17	1504	16792	3.28379	1	0.52969	0.506942

## Sheet: miRNA_annotation
	category	term	count	percent	fold	p_value	bonferroni	fdr	mi_rna	log_p
1	Function	Aging	6	0.0952381	5.8358	0.000391	0.1793	0.0232	hsa-mir-194-2,hsa-let-7e,hsa-mir-194-1,hsa-mir-22,hsa-mir-146a,hsa-mir-15a	3.40782
2	Function	Anti-Cell Proliferation(Hwang Etal Bjc2007)	2	0.25	15.319	0.00678	1	0.1487	hsa-mir-15a,hsa-let-7e	2.16877
3	Function	Cell Death	5	0.0641026	3.92794	0.00743	1	0.1535	hsa-let-7e,hsa-mir-30c-1,hsa-mir-146a,hsa-mir-23b,hsa-mir-29a	2.12901
4	Function	Cell Differentiation	5	0.0892857	5.47106	0.00173	0.7915	0.0602	hsa-mir-194-2,hsa-let-7e,hsa-mir-194-1,hsa-mir-424,hsa-mir-15a	2.76195
5	Function	Cell Proliferation	7	0.0875	5.36164	0.000202	0.0923	0.0211	hsa-mir-379,hsa-let-7e,hsa-mir-22,hsa-mir-140,hsa-mir-146a,hsa-mir-15a,hsa-mir-29a	3.69465
6	Function	Epithelial-to-Mesenchymal Transition	8	0.0963855	5.90611	3.11e-05	0.0143	0.00615	hsa-mir-194-2,hsa-let-7e,hsa-mir-194-1,hsa-mir-30c-1,hsa-mir-23b,hsa-mir-424,hsa-mir-15a,hsa-mir-29a	4.50724
7	Function	Hematopoiesis	6	0.105263	6.45009	0.000224	0.1025	0.0209	hsa-let-7e,hsa-mir-22,hsa-mir-30c-1,hsa-mir-146a,hsa-mir-15a,hsa-mir-29a	3.64975
8	Function	Innate Immunity	3	0.0714286	4.37685	0.0293	1	0.4129	hsa-let-7e,hsa-mir-146a,hsa-mir-1270	1.53313
9	Function	Pancreas Development	1	0.333333	20.4253	0.0482	1	0.4893	hsa-let-7e	1.31695
10	Function	Immune Response	7	0.076087	4.66229	0.000486	0.2225	0.024	hsa-mir-424,hsa-mir-15a,hsa-mir-22,hsa-mir-146a,hsa-mir-140,hsa-mir-1260b,hsa-mir-29a	3.31336
11	Function	Adipogenesis	5	0.25	15.319	1.06e-05	0.00484	0.00268	hsa-mir-188,hsa-mir-194-2,hsa-mir-140,hsa-mir-29a,hsa-mir-194-1	4.97469
12	Function	Chondrogenic Differentiation	2	0.333333	20.4253	0.00371	1	0.1013	hsa-mir-140,hsa-mir-29a	2.43063
13	Function	Inflammation	8	0.0714286	4.37685	0.000273	0.1251	0.0202	hsa-mir-194-2,hsa-mir-424,hsa-mir-188,hsa-mir-194-1,hsa-mir-22,hsa-mir-146a,hsa-mir-140,hsa-mir-29a	3.56384
14	Function	Osteogenesis	4	0.0677966	4.1543	0.014	1	0.2538	hsa-mir-194-2,hsa-mir-194-1,hsa-mir-140,hsa-mir-424	1.85387
15	Function	Cardiac Remodeling	2	0.222222	13.6169	0.00863	1	0.1762	hsa-mir-146a,hsa-mir-22	2.06399
16	Function	Cardiotoxicity	2	0.117647	7.20892	0.0301	1	0.4141	hsa-mir-424,hsa-mir-146a	1.52143
17	Function	DNA Damage Response	2	0.125	7.65948	0.0268	1	0.4001	hsa-mir-15a,hsa-mir-146a	1.57187
18	Function	Hormone-mediated Signaling Pathway	6	0.103448	6.33888	0.000247	0.113	0.0219	hsa-mir-379,hsa-mir-22,hsa-mir-146a,hsa-mir-23b,hsa-mir-15a,hsa-mir-29a	3.6073
19	Function	Onco-MiRNAs	4	0.108108	6.62442	0.00261	1	0.0759	hsa-mir-194-2,hsa-mir-194-1,hsa-mir-22,hsa-mir-146a	2.58336
20	Function	Skeletal Muscle Cell Differentiation	2	0.0909091	5.57053	0.0486	1	0.4565	hsa-mir-146a,hsa-mir-424	1.31336
21	Function	Lipid Metabolism	3	0.0666667	4.08506	0.035	1	0.3818	hsa-mir-379,hsa-mir-15a,hsa-mir-29a	1.45593
22	Function	Osteoblast Differentiation	3	0.12	7.3531	0.00706	1	0.1512	hsa-mir-188,hsa-mir-628,hsa-mir-29a	2.1512
23	Function	Circadian Rhythm	3	0.136364	8.3558	0.00489	1	0.1114	hsa-mir-194-2,hsa-mir-194-1,hsa-mir-29a	2.31069
24	Function	Bone Regeneration	3	0.1	6.12759	0.0118	1	0.2232	hsa-mir-22,hsa-mir-23b,hsa-mir-424	1.92812
25	Function	DNA Synthesis	1	0.5	30.6379	0.0324	1	0.4393	hsa-mir-22	1.48945
26	Function	Genomic Instability	1	0.333333	20.4253	0.0482	1	0.4893	hsa-mir-22	1.31695
27	Function	Neuron Apoptosis	2	0.133333	8.17011	0.0237	1	0.3627	hsa-mir-29a,hsa-mir-23b	1.62525
28	Function	Vascular Smooth Muscle Cell Migration	1	0.5	30.6379	0.0324	1	0.4393	hsa-mir-379	1.48945
29	Function	Cardiomyocyte Differentiation	1	0.333333	20.4253	0.0482	1	0.4893	hsa-mir-424	1.31695
30	Function	Cardiomyocyte Migration	1	0.5	30.6379	0.0324	1	0.4393	hsa-mir-424	1.48945
31	Function	Dentinogenesis	1	0.5	30.6379	0.0324	1	0.4393	hsa-mir-424	1.48945
32	Function	Myofibroblast Differentiation	1	0.333333	20.4253	0.0482	1	0.4893	hsa-mir-424	1.31695
33	Disease	Acute Coronary Syndrome	4	0.181818	11.1411	0.000342	0.1567	0.0217	hsa-let-7e,hsa-mir-652,hsa-mir-146a,hsa-mir-15a	3.46597
34	Disease	Allergic Rhinitis	2	0.0952381	5.8358	0.0446	1	0.4607	hsa-mir-146a,hsa-let-7e	1.35067
35	Disease	Asthma	4	0.097561	5.97813	0.00382	1	0.0969	hsa-let-7e,hsa-mir-22,hsa-mir-140,hsa-mir-146a	2.41794
36	Disease	Breast Neoplasms	8	0.054054	3.31221	0.00182	0.8314	0.062	hsa-mir-194-2,hsa-mir-30c-1,hsa-mir-15a,hsa-mir-194-1,hsa-mir-146a,hsa-let-7e,hsa-mir-629,hsa-mir-29a	2.73993
37	Disease	Carcinoma, Endometrial	6	0.103448	6.33888	0.000247	0.113	0.0219	hsa-mir-194-2,hsa-let-7e,hsa-mir-194-1,hsa-mir-146a,hsa-mir-23b,hsa-mir-424	3.6073
38	Disease	Carcinoma, Lung	7	0.0328639	2.01376	0.0499	1	0.4617	hsa-mir-660,hsa-mir-30c-1,hsa-mir-15a,hsa-mir-146a,hsa-let-7e,hsa-mir-140,hsa-mir-29a	1.3019
39	Disease	Carcinoma, Lung. Non-Small-Cell	10	0.0456621	2.79798	0.00157	0.72	0.057	hsa-mir-23b,hsa-mir-30c-1,hsa-mir-424,hsa-mir-15a,hsa-mir-379,hsa-mir-22,hsa-mir-146a,hsa-let-7e,hsa-mir-140,hsa-mir-29a	2.8041
40	Disease	Carcinoma, Nasopharyngeal	5	0.0438597	2.68754	0.0342	1	0.3751	hsa-mir-23b,hsa-mir-15a,hsa-mir-146a,hsa-let-7e,hsa-mir-29a	1.46597
41	Disease	Carcinoma, Ovarian	9	0.0463918	2.84269	0.00261	1	0.0749	hsa-mir-409,hsa-mir-23b,hsa-mir-873,hsa-mir-551a,hsa-mir-424,hsa-mir-22,hsa-mir-146a,hsa-let-7e,hsa-mir-29a	2.58336
42	Disease	Carcinoma, Pancreatic	8	0.0481928	2.95305	0.0038	1	0.0978	hsa-mir-23b,hsa-mir-30c-1,hsa-mir-15a,hsa-mir-22,hsa-mir-146a,hsa-let-7e,hsa-mir-652,hsa-mir-29a	2.42022
43	Disease	Carcinoma, Renal Cell	7	0.0588235	3.60446	0.00229	1	0.0715	hsa-mir-30c-1,hsa-mir-424,hsa-mir-15a,hsa-mir-22,hsa-mir-146a,hsa-let-7e,hsa-mir-29a	2.64016
44	Disease	Chronic Inflammation	2	0.142857	8.75369	0.0207	1	0.3289	hsa-mir-146a,hsa-let-7e	1.68403
45	Disease	Colon Neoplasms	8	0.103896	6.36632	1.77e-05	0.00812	0.00394	hsa-mir-194-2,hsa-let-7e,hsa-mir-194-1,hsa-mir-30c-1,hsa-mir-140,hsa-mir-146a,hsa-mir-629,hsa-mir-29a	4.75203
46	Disease	Crohn Disease	3	0.0909091	5.57053	0.0154	1	0.2674	hsa-let-7e,hsa-mir-146a,hsa-mir-29a	1.81248
47	Disease	Cystic Fibrosis	2	0.125	7.65948	0.0268	1	0.4001	hsa-mir-146a,hsa-let-7e	1.57187
48	Disease	Diabetes Mellitus, Type 2	9	0.0612245	3.75158	0.000338	0.1548	0.0222	hsa-mir-409,hsa-mir-23b,hsa-mir-15a,hsa-mir-22,hsa-mir-146a,hsa-let-7e,hsa-mir-766,hsa-mir-652,hsa-mir-29a	3.47108
49	Disease	Heart Failure	8	0.0666667	4.08506	0.000442	0.2024	0.0231	hsa-mir-23b,hsa-mir-30c-1,hsa-mir-424,hsa-mir-22,hsa-mir-146a,hsa-let-7e,hsa-mir-539,hsa-mir-29a	3.35458
50	Disease	Hepatitis C Virus Infection	8	0.091954	5.63456	4.42e-05	0.0202	0.00713	hsa-mir-194-2,hsa-mir-424,hsa-mir-194-1,hsa-mir-22,hsa-mir-146a,hsa-let-7e,hsa-mir-629,hsa-mir-29a	4.35458
51	Disease	Human Immunodeficiency Virus Infection	3	0.0638298	3.91123	0.0392	1	0.4167	hsa-let-7e,hsa-mir-146a,hsa-mir-29a	1.40671
52	Disease	Kaposi's Sarcoma	4	0.148148	9.07791	0.000776	0.3552	0.0353	hsa-let-7e,hsa-mir-146a,hsa-mir-409,hsa-mir-23b	3.11014
53	Disease	Leukemia, Myeloid, Chronic	5	0.0746269	4.57283	0.00385	1	0.0951	hsa-let-7e,hsa-mir-22,hsa-mir-140,hsa-mir-146a,hsa-mir-424	2.41454
54	Disease	Liver Diseases [unspecific]	3	0.103448	6.33888	0.0107	1	0.2121	hsa-let-7e,hsa-mir-146a,hsa-mir-29a	1.97062
55	Disease	Lung Neoplasms	5	0.0454546	2.78527	0.0298	1	0.4144	hsa-mir-146a,hsa-let-7e,hsa-mir-140,hsa-mir-629,hsa-mir-29a	1.52578
56	Disease	Malignant Neoplasms [unspecific]	6	0.12	7.3531	0.000106	0.0486	0.0145	hsa-let-7e,hsa-mir-22,hsa-mir-30c-1,hsa-mir-140,hsa-mir-15a,hsa-mir-29a	3.97469
57	Disease	Melanoma	8	0.0606061	3.71369	0.000848	0.3884	0.0368	hsa-mir-194-2,hsa-mir-23b,hsa-mir-424,hsa-mir-15a,hsa-mir-194-1,hsa-mir-22,hsa-mir-146a,hsa-let-7e	3.0716
58	Disease	Muscular Dystrophy	3	0.103448	6.33888	0.0107	1	0.2121	hsa-let-7e,hsa-mir-146a,hsa-mir-29a	1.97062
59	Disease	Neoplasms [unspecific]	12	0.0576923	3.53515	4.12e-05	0.0188	0.00731	hsa-mir-660,hsa-mir-23b,hsa-mir-424,hsa-mir-15a,hsa-mir-501,hsa-mir-188,hsa-mir-22,hsa-mir-146a,hsa-mir-548b,hsa-let-7e,hsa-mir-629,hsa-mir-29a	4.3851
60	Disease	Ovarian Neoplasms	8	0.0754717	4.62459	0.000185	0.0848	0.0219	hsa-mir-194-2,hsa-mir-30c-1,hsa-mir-194-1,hsa-mir-22,hsa-mir-146a,hsa-let-7e,hsa-mir-629,hsa-mir-29a	3.73283
61	Disease	Pancreatic Neoplasms	4	0.0625	3.82974	0.0185	1	0.3039	hsa-let-7e,hsa-mir-30c-1,hsa-mir-146a,hsa-mir-15a	1.73283
62	Disease	Pituitary Neoplasms	2	0.125	7.65948	0.0268	1	0.4001	hsa-mir-15a,hsa-let-7e	1.57187
63	Disease	Squamous Cell Carcinoma, Esophageal	6	0.0422535	2.58912	0.0239	1	0.3629	hsa-mir-194-2,hsa-mir-424,hsa-mir-15a,hsa-mir-194-1,hsa-mir-146a,hsa-let-7e	1.6216
64	Disease	Adenocarcinoma, Lung	5	0.0495049	3.03346	0.0214	1	0.3338	hsa-mir-409,hsa-mir-146a,hsa-mir-766,hsa-mir-140,hsa-mir-29a	1.66959
65	Disease	Autism Spectrum Disorder	4	0.142857	8.75369	0.000895	0.4097	0.0378	hsa-mir-140,hsa-mir-146a,hsa-mir-23b,hsa-mir-15a	3.04818
66	Disease	Carcinoma, Bladder	6	0.05	3.06379	0.011	1	0.2099	hsa-mir-409,hsa-mir-23b,hsa-mir-935,hsa-mir-146a,hsa-mir-140,hsa-mir-29a	1.95861
67	Disease	Glioma	8	0.0384615	2.35676	0.0149	1	0.2644	hsa-mir-194-2,hsa-mir-23b,hsa-mir-628,hsa-mir-873,hsa-mir-15a,hsa-mir-194-1,hsa-mir-140,hsa-mir-29a	1.82681
68	Disease	Gout	2	0.666667	40.8506	0.000764	0.3499	0.0367	hsa-mir-15a,hsa-mir-140	3.11691
69	Disease	Inner Ear Inflammation	1	0.5	30.6379	0.0324	1	0.4393	hsa-mir-140	1.48945
70	Disease	Myasthenia Gravis	3	0.214286	13.1305	0.00126	0.5779	0.0498	hsa-mir-140,hsa-mir-15a,hsa-mir-146a	2.89963
71	Disease	Mycobacterium Tuberculosis Infection	2	0.153846	9.42706	0.0179	1	0.3038	hsa-mir-140,hsa-mir-146a	1.74715
72	Disease	Myeloma	2	0.125	7.65948	0.0268	1	0.4001	hsa-mir-140,hsa-mir-15a	1.57187
73	Disease	Osteoarthritis	3	0.0731707	4.4836	0.0275	1	0.3938	hsa-mir-140,hsa-mir-146a,hsa-mir-15a	1.56067
74	Disease	Osteosarcoma	9	0.0526316	3.22505	0.00105	0.4822	0.0435	hsa-mir-194-2,hsa-mir-409,hsa-mir-15a,hsa-mir-379,hsa-mir-194-1,hsa-mir-22,hsa-mir-140,hsa-mir-539,hsa-mir-29a	2.97881
75	Disease	Salivary Gland Neoplasms	2	0.222222	13.6169	0.00863	1	0.1762	hsa-mir-140,hsa-mir-23b	2.06399
76	Disease	Spinal Chordoma	1	0.5	30.6379	0.0324	1	0.4393	hsa-mir-140	1.48945
77	Disease	Acute Ischemic Stroke	2	0.142857	8.75369	0.0207	1	0.3289	hsa-mir-146a,hsa-mir-22	1.68403
78	Disease	Allergy	2	0.0952381	5.8358	0.0446	1	0.4607	hsa-mir-146a,hsa-mir-22	1.35067
79	Disease	Alzheimer's Disease	6	0.06	3.67655	0.00451	1	0.104	hsa-mir-409,hsa-mir-15a,hsa-mir-188,hsa-mir-146a,hsa-mir-766,hsa-mir-29a	2.34582
80	Disease	Ankylosing Spondylitis	2	0.222222	13.6169	0.00863	1	0.1762	hsa-mir-146a,hsa-mir-29a	2.06399
81	Disease	Astrocytoma	3	0.176471	10.8134	0.00228	1	0.0724	hsa-mir-15a,hsa-mir-146a,hsa-mir-22	2.64207
82	Disease	Autoimmune Diseases [unspecific]	3	0.0833333	5.10632	0.0194	1	0.3169	hsa-mir-146a,hsa-mir-23b,hsa-mir-29a	1.7122
83	Disease	Carcinoma, Thyroid	3	0.0833333	5.10632	0.0194	1	0.3169	hsa-mir-146a,hsa-mir-23b,hsa-mir-539	1.7122
84	Disease	Cardiometabolic Disorders	2	0.5	30.6379	0.00151	0.6928	0.0572	hsa-mir-146a,hsa-mir-29a	2.82102
85	Disease	Cerebral Aneurysm	2	0.1	6.12759	0.0407	1	0.4285	hsa-mir-146a,hsa-mir-23b	1.39041
86	Disease	Cervical Neoplasms	4	0.210526	12.9002	0.000188	0.0859	0.0208	hsa-mir-23b,hsa-mir-194-2,hsa-mir-146a,hsa-mir-194-1	3.72584
87	Disease	Cholangiocarcinoma	4	0.114286	7.00296	0.00211	0.9678	0.0683	hsa-mir-194-2,hsa-mir-194-1,hsa-mir-146a,hsa-mir-29a	2.67572
88	Disease	Dermatomyositis	1	0.5	30.6379	0.0324	1	0.4393	hsa-mir-146a	1.48945
89	Disease	Diabetic Nephropathy	3	0.125	7.65948	0.00629	1	0.1396	hsa-mir-30c-1,hsa-mir-146a,hsa-mir-23b	2.20135
90	Disease	Diabetic Retinopathy	3	0.142857	8.75369	0.00427	1	0.1025	hsa-mir-15a,hsa-mir-146a,hsa-mir-29a	2.36957
91	Disease	Emphysema	2	1	61.2759	0.000257	0.1178	0.0208	hsa-mir-22,hsa-mir-146a	3.59007
92	Disease	Epilepsy	4	0.148148	9.07791	0.000776	0.3552	0.0353	hsa-mir-194-2,hsa-mir-194-1,hsa-mir-146a,hsa-mir-15a	3.11014
93	Disease	Graves' Disease	3	0.3	18.3828	0.000435	0.1991	0.0241	hsa-mir-660,hsa-mir-146a,hsa-mir-22	3.36151
94	Disease	Heart Diseases [unspecific]	4	0.105263	6.45009	0.00288	1	0.0812	hsa-mir-873,hsa-mir-194-2,hsa-mir-194-1,hsa-mir-146a	2.54061
95	Disease	Hepatitis B Virus Infection	4	0.0597015	3.65826	0.0215	1	0.3328	hsa-mir-22,hsa-mir-146a,hsa-mir-15a,hsa-mir-29a	1.66756
96	Disease	Human Papilloma Virus Infection	3	0.0882353	5.40669	0.0167	1	0.2873	hsa-mir-146a,hsa-mir-23b,hsa-mir-15a	1.77728
97	Disease	Ischemia-Reperfusion Injury	3	0.130435	7.9925	0.00556	1	0.1251	hsa-mir-194-2,hsa-mir-194-1,hsa-mir-146a	2.25493
98	Disease	Leukemia	5	0.0746269	4.57283	0.00385	1	0.0951	hsa-mir-660,hsa-mir-146a,hsa-mir-424,hsa-mir-15a,hsa-mir-29a	2.41454
99	Disease	Leukemia, Lymphoblastic	3	0.142857	8.75369	0.00427	1	0.1025	hsa-mir-146a,hsa-mir-29a,hsa-mir-22	2.36957
100	Disease	Leukemia, Lymphocytic, Chronic, B-Cell	4	0.117647	7.20892	0.00189	0.867	0.0635	hsa-mir-22,hsa-mir-146a,hsa-mir-15a,hsa-mir-29a	2.72354
101	Disease	Leukemia, Myeloid, Acute	8	0.0672269	4.11939	0.000417	0.191	0.0239	hsa-mir-409,hsa-mir-23b,hsa-mir-30c-1,hsa-mir-15a,hsa-mir-188,hsa-mir-22,hsa-mir-146a,hsa-mir-29a	3.37986
102	Disease	Liver Cirrhosis	4	0.0701754	4.30006	0.0124	1	0.2325	hsa-mir-22,hsa-mir-146a,hsa-mir-23b,hsa-mir-29a	1.90658
103	Disease	Lymphoma	6	0.1	6.12759	0.000298	0.1367	0.0212	hsa-mir-194-2,hsa-mir-194-1,hsa-mir-22,hsa-mir-146a,hsa-mir-23b,hsa-mir-15a	3.52578
104	Disease	Lymphoma, B-Cell	4	0.166667	10.2126	0.000486	0.2225	0.0247	hsa-mir-22,hsa-mir-146a,hsa-mir-15a,hsa-mir-29a	3.31336
105	Disease	Lymphoma, Burkitt's	2	0.153846	9.42706	0.0179	1	0.3038	hsa-mir-146a,hsa-mir-29a	1.74715
106	Disease	Multiple Myeloma	6	0.1	6.12759	0.000298	0.1367	0.0212	hsa-mir-194-2,hsa-mir-660,hsa-mir-194-1,hsa-mir-146a,hsa-mir-23b,hsa-mir-15a	3.52578
107	Disease	Myelodysplastic Syndromes	5	0.178571	10.9421	6.12e-05	0.028	0.00906	hsa-mir-194-2,hsa-mir-194-1,hsa-mir-146a,hsa-mir-424,hsa-mir-15a	4.21325
108	Disease	Myocardial Infarction	5	0.0961538	5.89191	0.00123	0.5637	0.0497	hsa-mir-660,hsa-mir-22,hsa-mir-146a,hsa-mir-424,hsa-mir-29a	2.91009
109	Disease	Neuropsychiatric Disorders [unspecific]	2	0.0909091	5.57053	0.0486	1	0.4565	hsa-mir-146a,hsa-mir-424	1.31336
110	Disease	Oral Lichen Planus	3	0.428571	26.2611	0.000131	0.06	0.0166	hsa-mir-628,hsa-mir-146a,hsa-mir-29a	3.88273
111	Disease	Pneumonia	1	0.333333	20.4253	0.0482	1	0.4893	hsa-mir-146a	1.31695
112	Disease	Prostate Neoplasms	10	0.133333	8.17011	1.03e-07	4.72e-05	3.05e-05	hsa-mir-194-2,hsa-mir-194-1,hsa-mir-22,hsa-mir-30c-1,hsa-mir-146a,hsa-mir-409,hsa-mir-23b,hsa-mir-629,hsa-mir-424,hsa-mir-15a	6.98716
113	Disease	Psoriasis	4	0.121212	7.42738	0.00169	0.7737	0.06	hsa-mir-194-2,hsa-mir-194-1,hsa-mir-146a,hsa-mir-424	2.77211
114	Disease	Pulmonary Hypertension	4	0.111111	6.80843	0.00235	1	0.072	hsa-mir-30c-1,hsa-mir-146a,hsa-mir-424,hsa-mir-29a	2.62893
115	Disease	Sepsis	3	0.0882353	5.40669	0.0167	1	0.2873	hsa-mir-146a,hsa-mir-15a,hsa-mir-29a	1.77728
116	Disease	Squamous Cell Carcinoma, Head and Neck	4	0.0833333	5.10632	0.00678	1	0.1469	hsa-mir-548b,hsa-mir-146a,hsa-mir-424,hsa-mir-29a	2.16877
117	Disease	Systemic Juvenile Idiopathic Arthritis	1	0.5	30.6379	0.0324	1	0.4393	hsa-mir-146a	1.48945
118	Disease	Thyroid Neoplasms	2	0.125	7.65948	0.0268	1	0.4001	hsa-mir-146a,hsa-mir-22	1.57187
119	Disease	Thyroid-Associated Ophthalmopathy	1	0.5	30.6379	0.0324	1	0.4393	hsa-mir-146a	1.48945
120	Disease	Adenocarcinoma, Pancreatic Ductal	4	0.056338	3.45216	0.0261	1	0.393	hsa-mir-194-2,hsa-mir-194-1,hsa-mir-23b,hsa-mir-15a	1.58336
121	Disease	Aortic Aneurysm, Abdominal	3	0.142857	8.75369	0.00427	1	0.1025	hsa-mir-194-2,hsa-mir-15a,hsa-mir-194-1	2.36957
122	Disease	Endometrial Stromal Sarcoma	1	0.333333	20.4253	0.0482	1	0.4893	hsa-mir-15a	1.31695
123	Disease	Endometriosis	4	0.097561	5.97813	0.00382	1	0.0969	hsa-mir-194-2,hsa-mir-194-1,hsa-mir-424,hsa-mir-15a	2.41794
124	Disease	Ependymoma	2	0.333333	20.4253	0.00371	1	0.1013	hsa-mir-15a,hsa-mir-29a	2.43063
125	Disease	Intervertebral Disc Degeneration	2	0.153846	9.42706	0.0179	1	0.3038	hsa-mir-15a,hsa-mir-589	1.74715
126	Disease	Leukemia, Lymphocytic, Chronic	3	0.0731707	4.4836	0.0275	1	0.3938	hsa-mir-22,hsa-mir-15a,hsa-mir-29a	1.56067
127	Disease	Uterine Leiomyosarcoma	1	0.5	30.6379	0.0324	1	0.4393	hsa-mir-15a	1.48945
128	Disease	Acute Kidney Injury	2	0.117647	7.20892	0.0301	1	0.4141	hsa-mir-194-2,hsa-mir-194-1	1.52143
129	Disease	Adenocarcinoma, Cervical	2	0.4	24.5103	0.0025	1	0.0752	hsa-mir-194-1,hsa-mir-194-2	2.60206
130	Disease	Adenovirus Infection	3	0.0833333	5.10632	0.0194	1	0.3169	hsa-mir-194-2,hsa-mir-194-1,hsa-mir-30c-1	1.7122
131	Disease	Barrett's Esophagus	2	0.181818	11.1411	0.0129	1	0.2391	hsa-mir-194-2,hsa-mir-194-1	1.88941
132	Disease	Celiac Disease	3	0.3	18.3828	0.000435	0.1991	0.0241	hsa-mir-194-2,hsa-mir-194-1,hsa-mir-551a	3.36151
133	Disease	Mandibular Prognathism	3	0.214286	13.1305	0.00126	0.5779	0.0498	hsa-mir-194-2,hsa-mir-629,hsa-mir-194-1	2.89963
134	Disease	Necrotizing Enterocolitis	2	0.181818	11.1411	0.0129	1	0.2391	hsa-mir-194-2,hsa-mir-194-1	1.88941
135	Disease	Polycystic Ovarian Syndrome	3	0.103448	6.33888	0.0107	1	0.2121	hsa-mir-194-2,hsa-mir-194-1,hsa-mir-23b	1.97062
136	Disease	Reflux Esophagitis	2	0.4	24.5103	0.0025	1	0.0752	hsa-mir-194-2,hsa-mir-194-1	2.60206
137	Disease	Adenocarcinoma, Esophageal	2	0.0909091	5.57053	0.0486	1	0.4565	hsa-mir-22,hsa-mir-23b	1.31336
138	Disease	Aortic Stenosis	3	0.12	7.3531	0.00706	1	0.1512	hsa-mir-22,hsa-mir-30c-1,hsa-mir-424	2.1512
139	Disease	Carcinoma, Renal Cell, Clear-Cell	5	0.0862069	5.2824	0.00203	0.928	0.0667	hsa-mir-22,hsa-mir-23b,hsa-mir-424,hsa-mir-629,hsa-mir-29a	2.6925
140	Disease	Rhabdomyosarcoma	2	0.111111	6.80843	0.0335	1	0.3695	hsa-mir-29a,hsa-mir-22	1.47496
141	Disease	Choroidal Neovascularization	1	0.5	30.6379	0.0324	1	0.4393	hsa-mir-29a	1.48945
142	Disease	Endomyocardial Fibrosis	1	0.333333	20.4253	0.0482	1	0.4893	hsa-mir-29a	1.31695
143	Disease	Pleural Mesothelioma	3	0.09375	5.74461	0.0141	1	0.2532	hsa-mir-379,hsa-mir-652,hsa-mir-29a	1.85078
144	Disease	Scleroderma, Systemic	1	0.333333	20.4253	0.0482	1	0.4893	hsa-mir-29a	1.31695
145	Disease	Silicosis	1	0.5	30.6379	0.0324	1	0.4393	hsa-mir-29a	1.48945
146	Disease	Fragile X Syndrome	1	0.5	30.6379	0.0324	1	0.4393	hsa-mir-424	1.48945
147	Disease	In Vitro Fertilization Failure	1	0.5	30.6379	0.0324	1	0.4393	hsa-mir-424	1.48945
148	Disease	Craniofacial Abnormalities	1	0.5	30.6379	0.0324	1	0.4393	hsa-mir-873	1.48945
149	Disease	Carcinoma, Gastric, Signet Ring Cell	1	0.333333	20.4253	0.0482	1	0.4893	hsa-mir-935	1.31695

## Sheet: SARS-CoV-1_perturbation_dif
	name	no_of_cell	RNA_type	identifier	status
1	ENSG00000147421	204	ceRNA	HMBOX1	lost_efficiency
2	ENSG00000134323	53	ceRNA	MYCN	lost_efficiency
3	ENSG00000146674	53	ceRNA	IGFBP3	lost_efficiency
4	ENSG00000162595	53	ceRNA	DIRAS3	lost_efficiency
5	ENSG00000185811	53	ceRNA	IKZF1	lost_efficiency
6	ENSG00000197054	53	ceRNA	ZNF763	lost_efficiency
7	COV_1_RNA	2799	ceRNA	#N/A	gained_efficiency
8	hsa-miR-1229-3p	304	miRNA	hsa-miR-1229-3p	gained_efficiency
9	hsa-miR-1307-3p	2799	miRNA	hsa-miR-1307-3p	gained_efficiency
10	hsa-miR-182-5p	294	miRNA	hsa-miR-182-5p	gained_efficiency
11	hsa-miR-22-5p	301	miRNA	hsa-miR-22-5p	gained_efficiency
12	hsa-miR-30c-1-3p	2531	miRNA	hsa-miR-30c-1-3p	gained_efficiency
13	hsa-miR-425-3p	2799	miRNA	hsa-miR-425-3p	gained_efficiency
14	hsa-miR-550a-3-5p	2799	miRNA	hsa-miR-550a-3-5p	gained_efficiency
15	hsa-miR-550a-5p	2684	miRNA	hsa-miR-550a-5p	gained_efficiency

## Sheet: SARS-CoV-2_perturbation_dif
	name	no_of_cell	RNA_type	identifier	status
1	ENSG00000169908	157	ceRNA	TM4SF1	lost_efficiency
2	ENSG00000108518	113	ceRNA	PFN1	lost_efficiency
3	ENSG00000040199	109	ceRNA	PHLPP2	lost_efficiency
4	ENSG00000087088	109	ceRNA	BAX	lost_efficiency
5	ENSG00000105856	109	ceRNA	HBP1	lost_efficiency
6	ENSG00000134996	108	ceRNA	OSTF1	lost_efficiency
7	ENSG00000169926	108	ceRNA	KLF13	lost_efficiency
8	ENSG00000157168	107	ceRNA	NRG1	lost_efficiency
9	ENSG00000131171	106	ceRNA	SH3BGRL	lost_efficiency
10	ENSG00000137312	106	ceRNA	FLOT1	lost_efficiency
11	ENSG00000256683	106	ceRNA	ZNF350	lost_efficiency
12	ENSG00000172465	105	ceRNA	TCEAL1	lost_efficiency
13	ENSG00000107864	104	ceRNA	CPEB3	lost_efficiency
14	ENSG00000119383	104	ceRNA	PTPA	lost_efficiency
15	ENSG00000121039	104	ceRNA	RDH10	lost_efficiency
16	ENSG00000145604	104	ceRNA	SKP2	lost_efficiency
17	ENSG00000096717	103	ceRNA	SIRT1	lost_efficiency
18	ENSG00000150593	103	ceRNA	PDCD4	lost_efficiency
19	ENSG00000196776	103	ceRNA	CD47	lost_efficiency
20	ENSG00000050165	102	ceRNA	DKK3	lost_efficiency
21	ENSG00000135503	102	ceRNA	ACVR1B	lost_efficiency
22	ENSG00000101665	101	ceRNA	SMAD7	lost_efficiency
23	ENSG00000124788	100	ceRNA	ATXN1	lost_efficiency
24	ENSG00000007944	99	ceRNA	MYLIP	lost_efficiency
25	ENSG00000089159	99	ceRNA	PXN	lost_efficiency
26	ENSG00000114739	99	ceRNA	ACVR2B	lost_efficiency
27	ENSG00000121989	99	ceRNA	ACVR2A	lost_efficiency
28	ENSG00000181472	99	ceRNA	ZBTB2	lost_efficiency
29	ENSG00000163430	98	ceRNA	FSTL1	lost_efficiency
30	ENSG00000175054	98	ceRNA	ATR	lost_efficiency
31	ENSG00000101844	97	ceRNA	ATG4A	lost_efficiency
32	ENSG00000102034	97	ceRNA	ELF4	lost_efficiency
33	ENSG00000185697	97	ceRNA	MYBL1	lost_efficiency
34	ENSG00000142864	96	ceRNA	SERBP1	lost_efficiency
35	ENSG00000066855	95	ceRNA	MTFR1	lost_efficiency
36	ENSG00000084636	95	ceRNA	COL16A1	lost_efficiency
37	ENSG00000113916	95	ceRNA	BCL6	lost_efficiency
38	ENSG00000164930	95	ceRNA	FZD6	lost_efficiency
39	ENSG00000051180	94	ceRNA	RAD51	lost_efficiency
40	ENSG00000069702	94	ceRNA	TGFBR3	lost_efficiency
41	ENSG00000181690	94	ceRNA	PLAG1	lost_efficiency
42	ENSG00000027075	93	ceRNA	PRKCH	lost_efficiency
43	ENSG00000136826	93	ceRNA	KLF4	lost_efficiency
44	ENSG00000184182	93	ceRNA	UBE2F	lost_efficiency
45	ENSG00000106004	92	ceRNA	HOXA5	lost_efficiency
46	ENSG00000113070	92	ceRNA	HBEGF	lost_efficiency
47	ENSG00000024422	91	ceRNA	EHD2	lost_efficiency
48	ENSG00000100714	91	ceRNA	MTHFD1	lost_efficiency
49	ENSG00000145335	91	ceRNA	SNCA	lost_efficiency
50	ENSG00000153814	91	ceRNA	JAZF1	lost_efficiency
51	ENSG00000180914	91	ceRNA	OXTR	lost_efficiency
52	ENSG00000196628	91	ceRNA	TCF4	lost_efficiency
53	ENSG00000125618	90	ceRNA	PAX8	lost_efficiency
54	ENSG00000137449	90	ceRNA	CPEB2	lost_efficiency
55	ENSG00000170961	90	ceRNA	HAS2	lost_efficiency
56	ENSG00000171206	90	ceRNA	TRIM8	lost_efficiency
57	ENSG00000183742	90	ceRNA	MACC1	lost_efficiency
58	ENSG00000072134	89	ceRNA	EPN2	lost_efficiency
59	ENSG00000133740	89	ceRNA	E2F5	lost_efficiency
60	ENSG00000178585	89	ceRNA	CTNNBIP1	lost_efficiency
61	ENSG00000187678	89	ceRNA	SPRY4	lost_efficiency
62	ENSG00000120875	88	ceRNA	DUSP4	lost_efficiency
63	ENSG00000116128	87	ceRNA	BCL9	lost_efficiency
64	ENSG00000166165	87	ceRNA	CKB	lost_efficiency
65	ENSG00000180694	87	ceRNA	TMEM64	lost_efficiency
66	ENSG00000066739	86	ceRNA	ATG2B	lost_efficiency
67	ENSG00000120068	86	ceRNA	HOXB8	lost_efficiency
68	ENSG00000116678	85	ceRNA	LEPR	lost_efficiency
69	ENSG00000206075	85	ceRNA	SERPINB5	lost_efficiency
70	ENSG00000179348	84	ceRNA	GATA2	lost_efficiency
71	ENSG00000119042	83	ceRNA	SATB2	lost_efficiency
72	ENSG00000232810	83	ceRNA	TNF	lost_efficiency
73	ENSG00000134057	82	ceRNA	CCNB1	lost_efficiency
74	ENSG00000158828	82	ceRNA	PINK1	lost_efficiency
75	ENSG00000198947	82	ceRNA	DMD	lost_efficiency
76	ENSG00000250506	82	ceRNA	CDK3	lost_efficiency
77	ENSG00000135828	81	ceRNA	RNASEL	lost_efficiency
78	ENSG00000163577	81	ceRNA	EIF5A2	lost_efficiency
79	ENSG00000153071	80	ceRNA	DAB2	lost_efficiency
80	ENSG00000177000	80	ceRNA	MTHFR	lost_efficiency
81	ENSG00000105329	79	ceRNA	TGFB1	lost_efficiency
82	ENSG00000119396	79	ceRNA	RAB14	lost_efficiency
83	ENSG00000134852	79	ceRNA	CLOCK	lost_efficiency
84	ENSG00000170345	79	ceRNA	FOS	lost_efficiency
85	ENSG00000170430	79	ceRNA	MGMT	lost_efficiency
86	ENSG00000197442	79	ceRNA	MAP3K5	lost_efficiency
87	ENSG00000072422	78	ceRNA	RHOBTB1	lost_efficiency
88	ENSG00000148400	78	ceRNA	NOTCH1	lost_efficiency
89	ENSG00000066777	77	ceRNA	ARFGEF1	lost_efficiency
90	ENSG00000164056	77	ceRNA	SPRY1	lost_efficiency
91	ENSG00000198121	77	ceRNA	LPAR1	lost_efficiency
92	ENSG00000092208	76	ceRNA	GEMIN2	lost_efficiency
93	ENSG00000164749	76	ceRNA	HNF4G	lost_efficiency
94	ENSG00000186416	76	ceRNA	NKRF	lost_efficiency
95	ENSG00000005108	75	ceRNA	THSD7A	lost_efficiency
96	ENSG00000085117	75	ceRNA	CD82	lost_efficiency
97	ENSG00000118257	75	ceRNA	NRP2	lost_efficiency
98	ENSG00000136869	75	ceRNA	TLR4	lost_efficiency
99	ENSG00000176920	75	ceRNA	FUT2	lost_efficiency
100	ENSG00000121481	74	ceRNA	RNF2	lost_efficiency
101	ENSG00000160179	74	ceRNA	ABCG1	lost_efficiency
102	ENSG00000106799	73	ceRNA	TGFBR1	lost_efficiency
103	ENSG00000160710	73	ceRNA	ADAR	lost_efficiency
104	ENSG00000172059	73	ceRNA	KLF11	lost_efficiency
105	ENSG00000115008	72	ceRNA	IL1A	lost_efficiency
106	ENSG00000126778	72	ceRNA	SIX1	lost_efficiency
107	ENSG00000130758	72	ceRNA	MAP3K10	lost_efficiency
108	ENSG00000197323	72	ceRNA	TRIM33	lost_efficiency
109	ENSG00000214575	72	ceRNA	CPEB1	lost_efficiency
110	ENSG00000016082	71	ceRNA	ISL1	lost_efficiency
111	ENSG00000102879	70	ceRNA	CORO1A	lost_efficiency
112	ENSG00000102837	69	ceRNA	OLFM4	lost_efficiency
113	ENSG00000166167	69	ceRNA	BTRC	lost_efficiency
114	ENSG00000198369	69	ceRNA	SPRED2	lost_efficiency
115	ENSG00000100307	68	ceRNA	CBX7	lost_efficiency
116	ENSG00000107443	68	ceRNA	CCNJ	lost_efficiency
117	ENSG00000107968	67	ceRNA	MAP3K8	lost_efficiency
118	ENSG00000112210	67	ceRNA	RAB23	lost_efficiency
119	ENSG00000136158	67	ceRNA	SPRY2	lost_efficiency
120	ENSG00000136634	67	ceRNA	IL10	lost_efficiency
121	ENSG00000142082	67	ceRNA	SIRT3	lost_efficiency
122	ENSG00000167105	67	ceRNA	TMEM92	lost_efficiency
123	ENSG00000256060	67	ceRNA	TRAPPC2B	lost_efficiency
124	ENSG00000078399	66	ceRNA	HOXA9	lost_efficiency
125	ENSG00000134248	66	ceRNA	LAMTOR5	lost_efficiency
126	ENSG00000160712	66	ceRNA	IL6R	lost_efficiency
127	ENSG00000104081	65	ceRNA	BMF	lost_efficiency
128	ENSG00000117650	65	ceRNA	NEK2	lost_efficiency
129	ENSG00000121966	65	ceRNA	CXCR4	lost_efficiency
130	ENSG00000048052	64	ceRNA	HDAC9	lost_efficiency
131	ENSG00000102755	64	ceRNA	FLT1	lost_efficiency
132	ENSG00000129473	64	ceRNA	BCL2L2	lost_efficiency
133	ENSG00000162595	64	ceRNA	DIRAS3	lost_efficiency
134	ENSG00000167333	63	ceRNA	TRIM68	lost_efficiency
135	ENSG00000169021	63	ceRNA	UQCRFS1	lost_efficiency
136	ENSG00000188641	63	ceRNA	DPYD	lost_efficiency
137	ENSG00000106511	62	ceRNA	MEOX2	lost_efficiency
138	ENSG00000170027	62	ceRNA	YWHAG	lost_efficiency
139	ENSG00000284194	62	ceRNA	SCO2	lost_efficiency
140	ENSG00000119950	61	ceRNA	MXI1	lost_efficiency
141	ENSG00000125740	61	ceRNA	FOSB	lost_efficiency
142	ENSG00000152642	61	ceRNA	GPD1L	lost_efficiency
143	ENSG00000162104	61	ceRNA	ADCY9	lost_efficiency
144	ENSG00000172575	61	ceRNA	RASGRP1	lost_efficiency
145	ENSG00000175305	61	ceRNA	CCNE2	lost_efficiency
146	ENSG00000132669	60	ceRNA	RIN2	lost_efficiency
147	ENSG00000133056	60	ceRNA	PIK3C2B	lost_efficiency
148	ENSG00000152256	60	ceRNA	PDK1	lost_efficiency
149	ENSG00000116833	58	ceRNA	NR5A2	lost_efficiency
150	ENSG00000237984	58	ceRNA	PTENP1	lost_efficiency
151	ENSG00000076770	57	ceRNA	MBNL3	lost_efficiency
152	ENSG00000120899	57	ceRNA	PTK2B	lost_efficiency
153	ENSG00000186106	57	ceRNA	ANKRD46	lost_efficiency
154	ENSG00000256453	57	ceRNA	DND1	lost_efficiency
155	ENSG00000007968	56	ceRNA	E2F2	lost_efficiency
156	ENSG00000112038	55	ceRNA	OPRM1	lost_efficiency
157	ENSG00000151694	55	ceRNA	ADAM17	lost_efficiency
158	ENSG00000158050	55	ceRNA	DUSP2	lost_efficiency
159	ENSG00000176171	55	ceRNA	BNIP3	lost_efficiency
160	ENSG00000116017	54	ceRNA	ARID3A	lost_efficiency
161	ENSG00000134748	54	ceRNA	PRPF38A	lost_efficiency
162	ENSG00000144749	54	ceRNA	LRIG1	lost_efficiency
163	ENSG00000156103	54	ceRNA	MMP16	lost_efficiency
164	ENSG00000170836	54	ceRNA	PPM1D	lost_efficiency
165	ENSG00000086189	53	ceRNA	DIMT1	lost_efficiency
166	ENSG00000131899	53	ceRNA	LLGL1	lost_efficiency
167	ENSG00000189283	53	ceRNA	FHIT	lost_efficiency
168	ENSG00000197548	53	ceRNA	ATG7	lost_efficiency
169	ENSG00000127955	52	ceRNA	GNAI1	lost_efficiency
170	ENSG00000138764	52	ceRNA	CCNG2	lost_efficiency
171	ENSG00000185499	52	ceRNA	MUC1	lost_efficiency
172	ENSG00000126561	51	ceRNA	STAT5A	lost_efficiency
173	ENSG00000127884	51	ceRNA	ECHS1	lost_efficiency
174	ENSG00000081985	50	ceRNA	IL12RB2	lost_efficiency
175	ENSG00000141101	50	ceRNA	NOB1	lost_efficiency
176	ENSG00000165272	50	ceRNA	AQP3	lost_efficiency
177	ENSG00000196470	50	ceRNA	SIAH1	lost_efficiency
178	ENSG00000173473	49	ceRNA	SMARCC1	lost_efficiency
179	ENSG00000138336	48	ceRNA	TET1	lost_efficiency
180	ENSG00000197461	48	ceRNA	PDGFA	lost_efficiency
181	ENSG00000113369	47	ceRNA	ARRDC3	lost_efficiency
182	ENSG00000167772	47	ceRNA	ANGPTL4	lost_efficiency
183	ENSG00000183765	47	ceRNA	CHEK2	lost_efficiency
184	ENSG00000152952	46	ceRNA	PLOD2	lost_efficiency
185	ENSG00000117115	45	ceRNA	PADI2	lost_efficiency
186	ENSG00000166484	45	ceRNA	MAPK7	lost_efficiency
187	ENSG00000204370	45	ceRNA	SDHD	lost_efficiency
188	ENSG00000077092	44	ceRNA	RARB	lost_efficiency
189	ENSG00000088305	44	ceRNA	DNMT3B	lost_efficiency
190	ENSG00000175595	44	ceRNA	ERCC4	lost_efficiency
191	ENSG00000213390	44	ceRNA	ARHGAP19	lost_efficiency
192	ENSG00000108691	43	ceRNA	CCL2	lost_efficiency
193	ENSG00000138109	43	ceRNA	CYP2C9	lost_efficiency
194	ENSG00000138182	43	ceRNA	KIF20B	lost_efficiency
195	ENSG00000168811	43	ceRNA	IL12A	lost_efficiency
196	COV_2_RNA	2799	ceRNA	#N/A	gained_efficiency
197	hsa-let-7e-3p	148	miRNA	hsa-let-7e-3p	gained_efficiency
198	hsa-miR-1260b	89	miRNA	hsa-miR-1260b	gained_efficiency
199	hsa-miR-1270	99	miRNA	hsa-miR-1270	gained_efficiency
200	hsa-miR-140-3p	98	miRNA	hsa-miR-140-3p	gained_efficiency
201	hsa-miR-146a-5p	106	miRNA	hsa-miR-146a-5p	gained_efficiency
202	hsa-miR-15a-3p	152	miRNA	hsa-miR-15a-3p	gained_efficiency
203	hsa-miR-188-5p	125	miRNA	hsa-miR-188-5p	gained_efficiency
204	hsa-miR-194-3p	113	miRNA	hsa-miR-194-3p	gained_efficiency
205	hsa-miR-22-3p	84	miRNA	hsa-miR-22-3p	gained_efficiency
206	hsa-miR-22-5p	143	miRNA	hsa-miR-22-5p	gained_efficiency
207	hsa-miR-23b-5p	124	miRNA	hsa-miR-23b-5p	gained_efficiency
208	hsa-miR-29a-5p	113	miRNA	hsa-miR-29a-5p	gained_efficiency
209	hsa-miR-30c-1-3p	119	miRNA	hsa-miR-30c-1-3p	gained_efficiency
210	hsa-miR-379-5p	83	miRNA	hsa-miR-379-5p	gained_efficiency
211	hsa-miR-409-3p	133	miRNA	hsa-miR-409-3p	gained_efficiency
212	hsa-miR-424-3p	123	miRNA	hsa-miR-424-3p	gained_efficiency
213	hsa-miR-501-5p	131	miRNA	hsa-miR-501-5p	gained_efficiency
214	hsa-miR-539-5p	81	miRNA	hsa-miR-539-5p	gained_efficiency
215	hsa-miR-548b-3p	82	miRNA	hsa-miR-548b-3p	gained_efficiency
216	hsa-miR-551a	108	miRNA	hsa-miR-551a	gained_efficiency
217	hsa-miR-589-5p	151	miRNA	hsa-miR-589-5p	gained_efficiency
218	hsa-miR-628-5p	120	miRNA	hsa-miR-628-5p	gained_efficiency
219	hsa-miR-629-5p	91	miRNA	hsa-miR-629-5p	gained_efficiency
220	hsa-miR-642a-5p	114	miRNA	hsa-miR-642a-5p	gained_efficiency
221	hsa-miR-652-3p	96	miRNA	hsa-miR-652-3p	gained_efficiency
222	hsa-miR-660-5p	148	miRNA	hsa-miR-660-5p	gained_efficiency
223	hsa-miR-766-3p	135	miRNA	hsa-miR-766-3p	gained_efficiency
224	hsa-miR-873-5p	149	miRNA	hsa-miR-873-5p	gained_efficiency
225	hsa-miR-935	89	miRNA	hsa-miR-935	gained_efficiency
